# Supplementary material for: Salivary miRNA Expression in Children With Persistent Post-concussive Symptoms
Source: PubMed Central journal article supplement (PMC9195510; doi:10.3389/fpubh.2022.890420), 2022-05-30
Supplement: Table_1.pdf [file Table_1.pdf]

**eTable 1. List of targets in the NanoString human v3 miRNA expression assay**

| <b>Official symbol</b> | <b>Accession number</b> | <b>Target Sequence</b>  |
|------------------------|-------------------------|-------------------------|
| hsa-let-7a-5p          | MIMAT0000062            | UGAGGUAGUAGGUUGUAUAGUU  |
| hsa-let-7b-5p          | MIMAT0000063            | UGAGGUAGUAGGUUGUGUGGUU  |
| hsa-let-7c-5p          | MIMAT0000064            | UGAGGUAGUAGGUUGUAUGGUU  |
| hsa-let-7d-5p          | MIMAT0000065            | AGAGGUAGUAGGUUGCAUAGUU  |
| hsa-let-7e-5p          | MIMAT0000066            | UGAGGUAGGAGGUUGUAUAGUU  |
| hsa-let-7f-5p          | MIMAT0000067            | UGAGGUAGUAGAUUGUAUAGUU  |
| hsa-miR-15a-5p         | MIMAT0000068            | UAGCAGCACAUAAUGGUUUGUG  |
| hsa-miR-16-5p          | MIMAT0000069            | UAGCAGCACGUAAAUAUUGGCG  |
| hsa-miR-17-5p          | MIMAT0000070            | CAAAGUGCUUACAGUGCAGGUAG |
| hsa-miR-18a-5p         | MIMAT0000072            | UAAGGUGCAUCUAGUGCAGAUAG |
| hsa-miR-19a-3p         | MIMAT0000073            | UGUGCAAUCUAUGCAAACUGA   |
| hsa-miR-19b-3p         | MIMAT0000074            | UGUGCAAUCCAUGCAAACUGA   |
| hsa-miR-20a-5p         | MIMAT0000075            | UAAAGUGCUUAUAGUGCAGGUAG |
| hsa-miR-21-5p          | MIMAT0000076            | UAGCUUAUCAGACUGAUGUUGA  |
| hsa-miR-22-3p          | MIMAT0000077            | AAGCUGCCAGUUGAAGAACUGU  |
| hsa-miR-23a-3p         | MIMAT0000078            | AUCACAUUGCCAGGGAUUUC    |
| hsa-miR-24-3p          | MIMAT0000080            | UGGCUAGUUCAGCAGGAACAG   |
| hsa-miR-25-3p          | MIMAT0000081            | CAUUGCACUUGUCUCGGUCUGA  |
| hsa-miR-26a-5p         | MIMAT0000082            | UUCAAGUAAUCCAGGAUAGGCU  |
| hsa-miR-26b-5p         | MIMAT0000083            | UUCAAGUAAUCCAGGAUAGGU   |
| hsa-miR-27a-3p         | MIMAT0000084            | UUCACAGUGGCUAAGUCCGC    |
| hsa-miR-28-5p          | MIMAT0000085            | AAGGAGCUCACAGUCUAUUGAG  |
| hsa-miR-29a-3p         | MIMAT0000086            | UAGACCAUCUGAAAUCGGUUA   |
| hsa-miR-30a-5p         | MIMAT0000087            | UGUAAACAUCCUCGACUGGAAG  |
| hsa-miR-30a-3p         | MIMAT0000088            | CUUUCAGUCGGAUGUUUGCAGC  |
| hsa-miR-31-5p          | MIMAT0000089            | AGGCAAGAUGCUGGCAUAGCU   |
| hsa-miR-32-5p          | MIMAT0000090            | UAUUGCACAUUACUAAGUUGCA  |
| hsa-miR-33a-5p         | MIMAT0000091            | GUGCAUUGUAGUUGCAUUGCA   |
| hsa-miR-92a-3p         | MIMAT0000092            | UAUUGCACUUGUCCCGCCUGU   |
| hsa-miR-93-5p          | MIMAT0000093            | CAAAGUGCUGUUCGUGCAGGUAG |
| hsa-miR-95-3p          | MIMAT0000094            | UUCAACGGGUUUUAUUGAGCA   |
| hsa-miR-96-5p          | MIMAT0000095            | UUUGGCACUAGCACAUUUUUGCU |
| hsa-miR-98-5p          | MIMAT0000096            | UGAGGUAGUAAGUUGUAUUGUU  |
| hsa-miR-99a-5p         | MIMAT0000097            | AACCCGUAGAUCGGAUCUUGUG  |
| hsa-miR-100-5p         | MIMAT0000098            | AACCCGUAGAUCGGAACUUGUG  |
| hsa-miR-101-3p         | MIMAT0000099            | UACAGUACUGUGUAUACUGAA   |

| Official symbol | Accession number | Target Sequence          |
|-----------------|------------------|--------------------------|
| hsa-miR-29b-3p  | MIMAT0000100     | UAGCACCAUUUGAAAUCAGUGUU  |
| hsa-miR-103a-3p | MIMAT0000101     | AGCAGCAUUGUACAGGGCUAUGA  |
| hsa-miR-105-5p  | MIMAT0000102     | UCAAAUGCUCAGACUCCUGUGGU  |
| hsa-miR-106a-5p | MIMAT0000103     | AAAAGUGCUUACAGUGCAGGUAG  |
| hsa-miR-107     | MIMAT0000104     | AGCAGCAUUGUACAGGGCUAUCA  |
| hsa-miR-192-5p  | MIMAT0000222     | CUGACCUAUGAAUUGACAGCC    |
| hsa-miR-196a-5p | MIMAT0000226     | UAGGUAGUUUCAUGUUGUUGGG   |
| hsa-miR-197-3p  | MIMAT0000227     | UUCACCACCUUCUCCACCCAGC   |
| hsa-miR-198     | MIMAT0000228     | GGUCCAGAGGGGAGAUAGGUUC   |
| hsa-miR-199a-5p | MIMAT0000231     | CCCAGUGUUCAGACUACCUGUUC  |
| hsa-miR-199a-3p | MIMAT0000232     | ACAGUAGUCUGCACAUUGGUUA   |
| hsa-miR-208a-3p | MIMAT0000241     | AUAAGACGAGCAAAAAGCUUGU   |
| hsa-miR-129-5p  | MIMAT0000242     | CUUUUUGCGGUCUGGGCUUGC    |
| hsa-miR-148a-3p | MIMAT0000243     | UCAGUGCACUACAGAACUUUGU   |
| hsa-miR-30c-5p  | MIMAT0000244     | UGUAAACAUCUACACUCUCAGC   |
| hsa-miR-30d-5p  | MIMAT0000245     | UGUAAACAUCUCCCGACUGGAAG  |
| hsa-miR-139-5p  | MIMAT0000250     | UCUACAGUGCACGUGUCUCCAG   |
| hsa-miR-147a    | MIMAT0000251     | GUGUGUGGAAAUGCUUCUGC     |
| hsa-miR-7-5p    | MIMAT0000252     | UGGAAGACUAGUGAUUUUGUUGU  |
| hsa-miR-10a-5p  | MIMAT0000253     | UACCCUGUAGAUCCGAAUUUGUG  |
| hsa-miR-10b-5p  | MIMAT0000254     | UACCCUGUAGAACCGAAUUUGUG  |
| hsa-miR-34a-5p  | MIMAT0000255     | UGGCAGUGUCUJAGCUGGUUGU   |
| hsa-miR-181a-5p | MIMAT0000256     | AACAUUCAACGCUGUCGGUGAGU  |
| hsa-miR-181b-5p | MIMAT0000257     | AACAUUCAUUGCUGUCGGUGGGU  |
| hsa-miR-181c-5p | MIMAT0000258     | AACAUUCAACUGUCGGUGAGU    |
| hsa-miR-182-5p  | MIMAT0000259     | UUUGGCAAUGGUAGAACUCACACU |
| hsa-miR-182-3p  | MIMAT0000260     | UGGUUCUAGACUUGCCAACUA    |
| hsa-miR-183-5p  | MIMAT0000261     | UAUGGCACUGGUAGAAUUCACU   |
| hsa-miR-187-3p  | MIMAT0000262     | UCGUGUCUUGUGUUGCAGCCGG   |
| hsa-miR-199b-5p | MIMAT0000263     | CCCAGUGUUUAGACUAUCUGUUC  |
| hsa-miR-203a-3p | MIMAT0000264     | GUGAAAUGUUUAGGACCACUAG   |
| hsa-miR-204-5p  | MIMAT0000265     | UUCCUUUGUCAUCCUAUGCCU    |
| hsa-miR-205-5p  | MIMAT0000266     | UCCUUCAUUCACCGGAGUCUG    |
| hsa-miR-210-3p  | MIMAT0000267     | CUGUGCGUGUGACAGCGGCUGA   |
| hsa-miR-211-5p  | MIMAT0000268     | UUCCUUUGUCAUCCUUCGCCU    |
| hsa-miR-212-3p  | MIMAT0000269     | UACAGUCUCCAGUCACGGCC     |
| hsa-miR-181a-3p | MIMAT0000270     | ACCAUCGACCGUUGAUUGUACC   |

| Official symbol | Accession number | Target Sequence         |
|-----------------|------------------|-------------------------|
| hsa-miR-214-3p  | MIMAT0000271     | ACAGCAGGCACAGACAGGCAGU  |
| hsa-miR-215-5p  | MIMAT0000272     | AUGACCUAUGAAUUGACAGAC   |
| hsa-miR-216a-5p | MIMAT0000273     | UAAUCUCAGCUGGCAACUGUGA  |
| hsa-miR-217     | MIMAT0000274     | UACUGCAUCAGGAACUGAUUGGA |
| hsa-miR-218-5p  | MIMAT0000275     | UUGUGCUUGAUCUAACCAUGU   |
| hsa-miR-219a-5p | MIMAT0000276     | UGAUUGUCCAAACGCAAUUCU   |
| hsa-miR-221-3p  | MIMAT0000278     | AGCUACAUUGUCUGCUGGGUUUC |
| hsa-miR-222-3p  | MIMAT0000279     | AGCUACAUUCUGGCUACUGGGU  |
| hsa-miR-223-3p  | MIMAT0000280     | UGUCAGUUUGUCAAAUACCCCA  |
| hsa-miR-224-5p  | MIMAT0000281     | CAAGUCACUAGUGGUUCCGUU   |
| hsa-miR-200b-3p | MIMAT0000318     | UAAUACUGCCUGGUAUUGAUGA  |
| hsa-let-7g-5p   | MIMAT0000414     | UGAGGUAGUAGUUUGUACAGUU  |
| hsa-let-7i-5p   | MIMAT0000415     | UGAGGUAGUAGUUUGUGCUGUU  |
| hsa-miR-1-3p    | MIMAT0000416     | UGGAAUGUAAAGAAGUAUGUAU  |
| hsa-miR-15b-5p  | MIMAT0000417     | UAGCAGCACAUCAUGGUUUACA  |
| hsa-miR-23b-3p  | MIMAT0000418     | AUCACAUUGCCAGGGAUUACC   |
| hsa-miR-27b-3p  | MIMAT0000419     | UUCACAGUGGCUAAGUUCUGC   |
| hsa-miR-30b-5p  | MIMAT0000420     | UGUAAACAUCUACACUCAGCU   |
| hsa-miR-122-5p  | MIMAT0000421     | UGGAGUGUGACAAUGGUGUUUG  |
| hsa-miR-124-3p  | MIMAT0000422     | UAAGGCACGCGGUGAAUGCC    |
| hsa-miR-125b-5p | MIMAT0000423     | UCCCUGAGACCCUAACUUGUGA  |
| hsa-miR-128-3p  | MIMAT0000424     | UCACAGUGAACCGGUCUCUUU   |
| hsa-miR-130a-3p | MIMAT0000425     | CAGUGCAAUGUUAAAAGGGCAU  |
| hsa-miR-132-3p  | MIMAT0000426     | UAACAGUCUACAGCCAUGGUCG  |
| hsa-miR-133a-3p | MIMAT0000427     | UUUGGUCCCCUUAACCAGCUG   |
| hsa-miR-135a-5p | MIMAT0000428     | UAUGGCUUUUUAUUCUUAUGUGA |
| hsa-miR-137     | MIMAT0000429     | UUAUUGCUUAAGAAUACGCGUAG |
| hsa-miR-138-5p  | MIMAT0000430     | AGCUGGUGUUGUGAAUCAGGCCG |
| hsa-miR-140-5p  | MIMAT0000431     | CAGUGGUUUUACCCUAUGGUAG  |
| hsa-miR-141-3p  | MIMAT0000432     | UAACACUGUCUGGUAAAGAUGG  |
| hsa-miR-142-5p  | MIMAT0000433     | CAUAAAGUAGAAAGCACUACU   |
| hsa-miR-142-3p  | MIMAT0000434     | UGUAGUGUUUCCUACUUUAUGGA |
| hsa-miR-143-3p  | MIMAT0000435     | UGAGAUGAAGCACUGUAGCUC   |
| hsa-miR-144-3p  | MIMAT0000436     | UACAGUAUAGAUGAUGUACU    |
| hsa-miR-145-5p  | MIMAT0000437     | GUCCAGUUUCCCAGGAAUCCCU  |
| hsa-miR-152-3p  | MIMAT0000438     | UCAGUGCAUGACAGAACUUGG   |
| hsa-miR-153-3p  | MIMAT0000439     | UUGCAUAGUCACAAAAGUGAUC  |

| Official symbol | Accession number | Target Sequence           |
|-----------------|------------------|---------------------------|
| hsa-miR-191-5p  | MIMAT0000440     | CAACGGAAUCCCAAAGCAGCUG    |
| hsa-miR-9-5p    | MIMAT0000441     | UCUUUGGUUAUCUAGCUGUAUGA   |
| hsa-miR-125a-5p | MIMAT0000443     | UCCCUGAGACCCUUUAACCUUGUGA |
| hsa-miR-126-3p  | MIMAT0000445     | UCGUACCGUGAGUAAUAAUGCG    |
| hsa-miR-127-3p  | MIMAT0000446     | UCGGAUCCGUCUGAGCUUGGCU    |
| hsa-miR-134-5p  | MIMAT0000447     | UGUGACUGGUUGACCAGAGGGG    |
| hsa-miR-136-5p  | MIMAT0000448     | ACUCCAUUUGUUUUGAUGAUGGA   |
| hsa-miR-146a-5p | MIMAT0000449     | UGAGAACUGAAUCCAUGGGUU     |
| hsa-miR-149-5p  | MIMAT0000450     | UCUGGCUCCGUGUCUUCACUCCC   |
| hsa-miR-150-5p  | MIMAT0000451     | UCUCCCAACCCUUGUACCAGUG    |
| hsa-miR-154-5p  | MIMAT0000452     | UAGGUUAUCCGUGUUGCCUUCG    |
| hsa-miR-184     | MIMAT0000454     | UGGACGGAGAACUGAUAAAGGGU   |
| hsa-miR-185-5p  | MIMAT0000455     | UGGAGAGAAAGGCAGUUCUGA     |
| hsa-miR-186-5p  | MIMAT0000456     | CAAAGAAUUCUCCUUUUGGGCU    |
| hsa-miR-188-5p  | MIMAT0000457     | CAUCCCUUGCAUGGUGGAGGG     |
| hsa-miR-190a-5p | MIMAT0000458     | UGAU AUGUUUGAUUAUUAUGGU   |
| hsa-miR-193a-3p | MIMAT0000459     | AACUGGCCUACAAAGUCCCAGU    |
| hsa-miR-194-5p  | MIMAT0000460     | UGU AACAGCAACUCCAUGUGGA   |
| hsa-miR-195-5p  | MIMAT0000461     | UAGCAGCACAGAAAUAUUGGC     |
| hsa-miR-206     | MIMAT0000462     | UGGAAUGUAAGGAAGUGUGUGG    |
| hsa-miR-320a    | MIMAT0000510     | AAAAGCUGGGUUGAGAGGGCGA    |
| hsa-miR-200c-3p | MIMAT0000617     | UAAUACUGCCGGGUAAUGAUGGA   |
| hsa-miR-155-5p  | MIMAT0000646     | UUAAUGCUAAUCGUGAUAGGGGU   |
| hsa-miR-106b-5p | MIMAT0000680     | UAAAGUGCUGACAGUGCAGAU     |
| hsa-miR-29c-3p  | MIMAT0000681     | UAGCACCAUUUGAAAUCGGUUA    |
| hsa-miR-200a-3p | MIMAT0000682     | UAACACUGUCUGGUAACGAUGU    |
| hsa-miR-302a-5p | MIMAT0000683     | ACUUAACGUGGAUGUACUUGCU    |
| hsa-miR-302a-3p | MIMAT0000684     | UAAGUGCUUCCAUGUUUUGGUGA   |
| hsa-miR-34c-5p  | MIMAT0000686     | AGGCAGUGUAGUUAGCUGAUUGC   |
| hsa-miR-299-3p  | MIMAT0000687     | UAUGUGGGAUGGUAAACCGCUU    |
| hsa-miR-301a-3p | MIMAT0000688     | CAGUGCAAUAGUAUUGUCAAAAGC  |
| hsa-miR-99b-5p  | MIMAT0000689     | CACCCGUAGAACCGACCUUGCG    |
| hsa-miR-296-5p  | MIMAT0000690     | AGGGCCCCCUCAAUCCUGU       |
| hsa-miR-130b-3p | MIMAT0000691     | CAGUGCAAUGAUGAAAGGGCAU    |
| hsa-miR-30e-5p  | MIMAT0000692     | UGUAAACAUCUUGACUGGAAG     |
| hsa-miR-30e-3p  | MIMAT0000693     | CUUUCAGUCGGAUGUUUACAGC    |
| hsa-miR-361-5p  | MIMAT0000703     | UUAUCAGAAUCUCCAGGGGUAC    |

| Official symbol | Accession number | Target Sequence          |
|-----------------|------------------|--------------------------|
| hsa-miR-362-5p  | MIMAT0000705     | AAUCCUUGGAACCUAGGUGUGAGU |
| hsa-miR-363-3p  | MIMAT0000707     | AAUUGCACGGUAUCCAUCUGUA   |
| hsa-miR-365a-3p | MIMAT0000710     | UAAUGCCCCUAAAAUCCUUAU    |
| hsa-miR-302b-3p | MIMAT0000715     | UAAGUGCUUCCAUGUUUUAGUAG  |
| hsa-miR-302c-3p | MIMAT0000717     | UAAGUGCUUCCAUGUUUCAGUGG  |
| hsa-miR-302d-3p | MIMAT0000718     | UAAGUGCUUCCAUGUUUGAGUGU  |
| hsa-miR-367-3p  | MIMAT0000719     | AAUUGCACUUUAGCAAUGGUGA   |
| hsa-miR-376c-3p | MIMAT0000720     | AACAUAGAGGAAAUCCACGU     |
| hsa-miR-369-3p  | MIMAT0000721     | AAUAAUACAUGGUUGAUCUUU    |
| hsa-miR-370-3p  | MIMAT0000722     | GCCUGCUGGGGUGGAACCUGGU   |
| hsa-miR-372-3p  | MIMAT0000724     | AAAGUGCUGCGACAUUUGAGCGU  |
| hsa-miR-373-3p  | MIMAT0000726     | GAAGUGCUUCGAUUUUUGGGUGU  |
| hsa-miR-374a-5p | MIMAT0000727     | UUUAUAUACAACCUGAUAAGUG   |
| hsa-miR-375     | MIMAT0000728     | UUUGUUCGUUCGGCUCGCGUGA   |
| hsa-miR-376a-3p | MIMAT0000729     | AUCAUAGAGGAAAUCCACGU     |
| hsa-miR-377-3p  | MIMAT0000730     | AUCACACAAAGGCAACUUUUGU   |
| hsa-miR-379-5p  | MIMAT0000733     | UGGUAGACUAUGGAACGUAGG    |
| hsa-miR-380-3p  | MIMAT0000735     | UAUGUAAUAUGGUCCACAUCUU   |
| hsa-miR-381-3p  | MIMAT0000736     | UAUACAAGGGCAAGCUCUCUGU   |
| hsa-miR-382-5p  | MIMAT0000737     | GAAGUUGUUCGUGGGUGGAUUCG  |
| hsa-miR-383-5p  | MIMAT0000738     | AGAUCAGAAGGUGAUUGUGGCU   |
| hsa-miR-330-3p  | MIMAT0000751     | GCAAAGCACACGGCCUGCAGAGA  |
| hsa-miR-328-3p  | MIMAT0000752     | CUGGCCUCUCUGCCCUUCCGU    |
| hsa-miR-342-3p  | MIMAT0000753     | UCUCACACAGAAUUCGCACCCGU  |
| hsa-miR-337-3p  | MIMAT0000754     | CUCCUAUAUGAUGCCUUUCUUC   |
| hsa-miR-323a-3p | MIMAT0000755     | CACAUUACACGGUCGACCUCU    |
| hsa-miR-326     | MIMAT0000756     | CCUCUGGGCCCUUCCUCCAG     |
| hsa-miR-151a-3p | MIMAT0000757     | CUAGACUGAAGCUCCUUGAGG    |
| hsa-miR-135b-5p | MIMAT0000758     | UAUGGCUUUUCAUUCCUAUGUGA  |
| hsa-miR-148b-3p | MIMAT0000759     | UCAGUGCAUCACAGAACUUUGU   |
| hsa-miR-331-3p  | MIMAT0000760     | GCCCCUGGGCCUAUCCUAGAA    |
| hsa-miR-324-5p  | MIMAT0000761     | CGCAUCCCUAGGGCAUUGGUGU   |
| hsa-miR-324-3p  | MIMAT0000762     | ACUGCCCAGGUGCUGCUGG      |
| hsa-miR-339-5p  | MIMAT0000764     | UCCUGUCCUCCAGGAGCUCACG   |
| hsa-miR-335-5p  | MIMAT0000765     | UCAAGAGCAUAACGAAAAUGU    |
| hsa-miR-133b    | MIMAT0000770     | UUUGGUCCCUUCAACCAGCUA    |
| hsa-miR-325     | MIMAT0000771     | CCUAGUAGGUGUCCAGUAAGUGU  |

| Official symbol | Accession number | Target Sequence         |
|-----------------|------------------|-------------------------|
| hsa-miR-345-5p  | MIMAT0000772     | GCUGACUCCUAGUCCAGGGCUC  |
| hsa-miR-346     | MIMAT0000773     | UGUCUGCCCCGAUGCCUGCCUCU |
| hsa-miR-384     | MIMAT0001075     | AUUCCUAGAAAUUGUUCAUA    |
| hsa-miR-196b-5p | MIMAT0001080     | UAGGUAGUUUCCUGUUGUUGGG  |
| hsa-miR-422a    | MIMAT0001339     | ACUGGACUUAGGGUCAGAAGGC  |
| hsa-miR-423-3p  | MIMAT0001340     | AGCUCGGUCUGAGGCCCCUCAGU |
| hsa-miR-424-5p  | MIMAT0001341     | CAGCAGCAAUUCAUGUUUUGAA  |
| hsa-miR-18b-5p  | MIMAT0001412     | UAAGGUGCAUCUAGUGCAGUUAG |
| hsa-miR-20b-5p  | MIMAT0001413     | CAAAGUGCUCAUAGUGCAGGUAG |
| hsa-miR-448     | MIMAT0001532     | UUGCAUAUGUAGGAUGUCCAU   |
| hsa-miR-429     | MIMAT0001536     | UAAUACUGUCUGGUAAAACCGU  |
| hsa-miR-449a    | MIMAT0001541     | UGGCAGUGUAUUGUUAGCUGGU  |
| hsa-miR-450a-5p | MIMAT0001545     | UUUUGCGAUGUGUUCUAAUUAU  |
| hsa-miR-369-5p  | MIMAT0001621     | AGAUCGACCGUGUUAUUAUCGC  |
| hsa-miR-431-5p  | MIMAT0001625     | UGUCUUGCAGGCCGUAUGCA    |
| hsa-miR-433-3p  | MIMAT0001627     | AUCAUGAUGGGCUCCUCGGUGU  |
| hsa-miR-329-3p  | MIMAT0001629     | AACACACCGGUUAACCUCUUU   |
| hsa-miR-323b-5p | MIMAT0001630     | AGGUUGUCCGUGGUGAGUUCGCA |
| hsa-miR-451a    | MIMAT0001631     | AAACCGUUACCAUUACUGAGUU  |
| hsa-miR-452-5p  | MIMAT0001635     | AACUGUUUGCAGAGGAAACUGA  |
| hsa-miR-409-5p  | MIMAT0001638     | AGGUUACCCGAGCAACUUUGCAU |
| hsa-miR-409-3p  | MIMAT0001639     | GAAUGUUGCUCGGUGAACCCCU  |
| hsa-miR-412-3p  | MIMAT0002170     | ACUUCACCGUGGCCACUAGCCGU |
| hsa-miR-410-3p  | MIMAT0002171     | AAUUAUACACAGAUGGCCUGU   |
| hsa-miR-376b-3p | MIMAT0002172     | AUCAUAGAGGAAAAUCCAUGUU  |
| hsa-miR-483-3p  | MIMAT0002173     | UCACUCCUCUCCUCCCGUCUU   |
| hsa-miR-484     | MIMAT0002174     | UCAGGCUCAGUCCCCUCCGAU   |
| hsa-miR-485-5p  | MIMAT0002175     | AGAGGCUGGCCGUGAUGAAUUC  |
| hsa-miR-485-3p  | MIMAT0002176     | GUCAUACACGGCUCUCCUCUCU  |
| hsa-miR-487a-3p | MIMAT0002178     | AAUCAUACAGGGACAUCAGUU   |
| hsa-miR-489-3p  | MIMAT0002805     | GUGACAUCACAUUAUCGGCAGC  |
| hsa-miR-490-3p  | MIMAT0002806     | CAACCGGAGGACUCCAUGCUG   |
| hsa-miR-491-5p  | MIMAT0002807     | AGUGGGGAACCCUCCAUGAGG   |
| hsa-miR-511-5p  | MIMAT0002808     | GUGUCUUUUGCUCUGCAGUCA   |
| hsa-miR-146b-5p | MIMAT0002809     | UGAGAACUGAAUCCAAGGCU    |
| hsa-miR-202-3p  | MIMAT0002811     | AGAGGUUAUAGGGCAUGGGAA   |
| hsa-miR-492     | MIMAT0002812     | AGGACCUGCGGGACAAGAUUCUU |

| Official symbol | Accession number | Target Sequence          |
|-----------------|------------------|--------------------------|
| hsa-miR-432-5p  | MIMAT0002814     | UCUUGGAGUAGGUCAUUGGGUGG  |
| hsa-miR-494-3p  | MIMAT0002816     | UGAAACAUACACGGGAAACCUC   |
| hsa-miR-495-3p  | MIMAT0002817     | AAACAAACAUGGUGCACUUCUU   |
| hsa-miR-496     | MIMAT0002818     | UGAGUAUUACAUGGCCAAUCUC   |
| hsa-miR-193b-3p | MIMAT0002819     | AACUGGCCCUCAAAGUCCCGCU   |
| hsa-miR-497-5p  | MIMAT0002820     | CAGCAGCACACUGUGGUUUGU    |
| hsa-miR-181d-5p | MIMAT0002821     | AACAUUCAUUGUUGUCGGUGGGU  |
| hsa-miR-512-5p  | MIMAT0002822     | CACUCAGCCUUGAGGGCACUUUC  |
| hsa-miR-512-3p  | MIMAT0002823     | AAGUGCUGUCAUAGCUGAGGUC   |
| hsa-miR-498     | MIMAT0002824     | UUUCAAGCCAGGGGGCGUUUUUC  |
| hsa-miR-520e    | MIMAT0002825     | AAAGUGCUUCCUUUUUGAGGG    |
| hsa-miR-515-5p  | MIMAT0002826     | UUCUCCAAAAGAAAGCACUUUCUG |
| hsa-miR-515-3p  | MIMAT0002827     | GAGUGCCUUCUUUUGGAGCGUU   |
| hsa-miR-519e-3p | MIMAT0002829     | AAGUGCCUCCUUUUAGAGUGUU   |
| hsa-miR-520f-3p | MIMAT0002830     | AAGUGCUUCCUUUUAGAGGGUU   |
| hsa-miR-519c-5p | MIMAT0002831     | CUCUAGAGGGAAGCGCUUUCUG   |
| hsa-miR-519c-3p | MIMAT0002832     | AAAGUGCAUCUUUUUAGAGGAU   |
| hsa-miR-520a-5p | MIMAT0002833     | CUCCAGAGGGAAGUACUUUCU    |
| hsa-miR-520a-3p | MIMAT0002834     | AAAGUGCUUCCCUUUGGACUGU   |
| hsa-miR-526b-5p | MIMAT0002835     | CUCUUGAGGGAAGCACUUUCUGU  |
| hsa-miR-519b-3p | MIMAT0002837     | AAAGUGCAUCCUUUUAGAGGUU   |
| hsa-miR-525-5p  | MIMAT0002838     | CUCCAGAGGGAUGCACUUUCU    |
| hsa-miR-525-3p  | MIMAT0002839     | GAAGGCGCUUCCCUUUAGAGCG   |
| hsa-miR-523-3p  | MIMAT0002840     | GAACGCGCUUCCCUAUAGAGGGU  |
| hsa-miR-518f-3p | MIMAT0002842     | GAAAGCGCUUCUCUUUAGAGG    |
| hsa-miR-520b    | MIMAT0002843     | AAAGUGCUUCCUUUUAGAGGG    |
| hsa-miR-518b    | MIMAT0002844     | CAAAGCGCUCCCUUUUAGAGGU   |
| hsa-miR-526a    | MIMAT0002845     | CUCUAGAGGGAAGCACUUUCUG   |
| hsa-miR-520c-3p | MIMAT0002846     | AAAGUGCUUCCUUUUAGAGGGU   |
| hsa-miR-518c-5p | MIMAT0002847     | UCUCUGGAGGGAAGCACUUUCUG  |
| hsa-miR-518c-3p | MIMAT0002848     | CAAAGCGCUUCUCUUUAGAGUGU  |
| hsa-miR-524-3p  | MIMAT0002850     | GAAGGCGCUUCCCUUUGGAGU    |
| hsa-miR-517a-3p | MIMAT0002852     | AUCGUGCAUCCCUUUAGAGUGU   |
| hsa-miR-519d-3p | MIMAT0002853     | CAAAGUGCCUCCCUUUAGAGUG   |
| hsa-miR-521     | MIMAT0002854     | AACGCACUUCCCUUUAGAGUGU   |
| hsa-miR-520d-5p | MIMAT0002855     | CUACAAAGGGAAGCCCUUUC     |
| hsa-miR-520d-3p | MIMAT0002856     | AAAGUGCUUCUCUUUGGUGGGU   |

| Official symbol | Accession number | Target Sequence          |
|-----------------|------------------|--------------------------|
| hsa-miR-517b-3p | MIMAT0002857     | AUCGUGCAUCCCUUUAGAGUGU   |
| hsa-miR-520g-3p | MIMAT0002858     | ACAAAGUGCUUCCCUUUAGAGUGU |
| hsa-miR-516b-5p | MIMAT0002859     | AUCUGGAGGUAAGAAGCACUUU   |
| hsa-miR-516b-3p | MIMAT0002860     | UGCUUCCUUCAGAGGGU        |
| hsa-miR-518e-3p | MIMAT0002861     | AAAGCGCUUCCCUUCAGAGUG    |
| hsa-miR-527     | MIMAT0002862     | CUGCAAAGGGAAGCCCUUUC     |
| hsa-miR-518d-3p | MIMAT0002864     | CAAAGCGCUUCCCUUUGGAGC    |
| hsa-miR-517c-3p | MIMAT0002866     | AUCGUGCAUCCUUUUAGAGUGU   |
| hsa-miR-520h    | MIMAT0002867     | ACAAAGUGCUUCCCUUUAGAGU   |
| hsa-miR-522-3p  | MIMAT0002868     | AAA AUGGUUCCCUUUAGAGUGU  |
| hsa-miR-519a-3p | MIMAT0002869     | AAAGUGCAUCCUUUUAGAGUGU   |
| hsa-miR-499a-5p | MIMAT0002870     | UUAAGACUUGCAGUGAUGUUU    |
| hsa-miR-501-5p  | MIMAT0002872     | AAUCCUUGUCCUGGGUGAGA     |
| hsa-miR-502-5p  | MIMAT0002873     | AUCCUUGCUAUCUGGGUGCUA    |
| hsa-miR-503-5p  | MIMAT0002874     | UAGCAGCGGGAACAGUUCUGCAG  |
| hsa-miR-504-5p  | MIMAT0002875     | AGACCCUGGUCUGCACUCUAUC   |
| hsa-miR-505-3p  | MIMAT0002876     | CGUCAACACUUGCUGGUUCCU    |
| hsa-miR-513a-5p | MIMAT0002877     | UUCACAGGGAGGUGUCAU       |
| hsa-miR-506-3p  | MIMAT0002878     | UAAGGCACCCUUCUGAGUAGA    |
| hsa-miR-507     | MIMAT0002879     | UUUUGCACCUUUUGGAGUGAA    |
| hsa-miR-508-3p  | MIMAT0002880     | UGAUUGUAGCCUUUUGGAGUAGA  |
| hsa-miR-509-3p  | MIMAT0002881     | UGAUUGGUACGUCUGUGGGUAG   |
| hsa-miR-510-5p  | MIMAT0002882     | UACUCAGGAGAGUGGCAAUCAC   |
| hsa-miR-514a-3p | MIMAT0002883     | AUUGACACUUCUGUGAGUAGA    |
| hsa-miR-532-5p  | MIMAT0002888     | CAUGCCUUGAGUGUAGGACCGU   |
| hsa-miR-299-5p  | MIMAT0002890     | UGGUUUACCGUCCACAUAUACU   |
| hsa-miR-455-5p  | MIMAT0003150     | UAUGUGCCUUGGACUACAUCG    |
| hsa-miR-493-3p  | MIMAT0003161     | UGAAGGUCUACUGUGUGCCAGG   |
| hsa-miR-539-5p  | MIMAT0003163     | GGAGAAUUAUCCUUGGUGUGU    |
| hsa-miR-544a    | MIMAT0003164     | AUUCUGCAUUUUUAGCAAGUUC   |
| hsa-miR-545-3p  | MIMAT0003165     | UCAGCAAACAUUUUUGUGUGC    |
| hsa-miR-487b-3p | MIMAT0003180     | AAUCGUACAGGGUCAUCCACUU   |
| hsa-miR-551a    | MIMAT0003214     | GCGACCCACUCUUGGUUCCA     |
| hsa-miR-552-3p  | MIMAT0003215     | AACAGGUGACUGGUUAGACAA    |
| hsa-miR-553     | MIMAT0003216     | AAAACGGUGAGAUUUUGUUUU    |
| hsa-miR-554     | MIMAT0003217     | GCUAGUCCUGACUCAGCCAGU    |
| hsa-miR-92b-3p  | MIMAT0003218     | UAUUGCACUCGUCCCGCCUCC    |



| Official symbol | Accession number | Target Sequence          |
|-----------------|------------------|--------------------------|
| hsa-miR-555     | MIMAT0003219     | AGGGUAAGCUGAACCUCUGAU    |
| hsa-miR-556-5p  | MIMAT0003220     | GAUGAGCUCAUUGUAAUAUGAG   |
| hsa-miR-561-3p  | MIMAT0003225     | CAAAGUUUAAGAUCUUGAAGU    |
| hsa-miR-562     | MIMAT0003226     | AAAGUAGCUGUACCAUUUGC     |
| hsa-miR-563     | MIMAT0003227     | AGGUUGACAUACGUUUCCC      |
| hsa-miR-564     | MIMAT0003228     | AGGCACGGUGUCAGCAGGC      |
| hsa-miR-566     | MIMAT0003230     | GGGCGCCUGUGAUCCCAAC      |
| hsa-miR-567     | MIMAT0003231     | AGUAUGUUCUCCAGGACAGAAC   |
| hsa-miR-568     | MIMAT0003232     | AUGUAUAAAUGUAUACACAC     |
| hsa-miR-551b-3p | MIMAT0003233     | GCGACCAUACUUGGUUUCAG     |
| hsa-miR-570-3p  | MIMAT0003235     | CGAAAACAGCAAUUACCUUUGC   |
| hsa-miR-571     | MIMAT0003236     | UGAGUUGCCAUCUGAGUGAG     |
| hsa-miR-572     | MIMAT0003237     | GUCCGCUCGGCGGUGGCCCA     |
| hsa-miR-573     | MIMAT0003238     | CUGAAGUGAUGUGUAACUGAUCAG |
| hsa-miR-574-3p  | MIMAT0003239     | CACGCUCAUGCACACACCCACA   |
| hsa-miR-575     | MIMAT0003240     | GAGCCAGUUGGACAGGAGC      |
| hsa-miR-576-5p  | MIMAT0003241     | AUUCUAAUUUCUCCACGUCUUU   |
| hsa-miR-577     | MIMAT0003242     | UAGAUAUUUAUUUGGUACCUG    |
| hsa-miR-578     | MIMAT0003243     | CUUCUUGUGCUCUAGGAUUGU    |
| hsa-miR-579-3p  | MIMAT0003244     | UUCAUUUGGUUAUAAACCGCAUU  |
| hsa-miR-580-3p  | MIMAT0003245     | UUGAGAAUGAUGAAUCAUUAGG   |
| hsa-miR-582-5p  | MIMAT0003247     | UUACAGUUGUJCAACCAGUUACU  |
| hsa-miR-584-5p  | MIMAT0003249     | UUAUGGUUUGCCUGGGACUGAG   |
| hsa-miR-585-3p  | MIMAT0003250     | UGGGCGUAUCUGUAUGCUA      |
| hsa-miR-548a-3p | MIMAT0003251     | CAAAACUGGCAAUUACUUUUGC   |
| hsa-miR-587     | MIMAT0003253     | UUUCCAUAAGGUGAUGAGUCAC   |
| hsa-miR-548b-3p | MIMAT0003254     | CAAGAACCUCAGUUGCUUUUGU   |
| hsa-miR-590-5p  | MIMAT0003258     | GAGCUUAUUCAUAAAAGUGCAG   |
| hsa-miR-591     | MIMAT0003259     | AGACCAUGGGUUCUCAUUGU     |
| hsa-miR-592     | MIMAT0003260     | UUGUGUCAUAUGCGAUGAUGU    |
| hsa-miR-595     | MIMAT0003263     | GAAGUGUGCCGUGGUGUGUCU    |
| hsa-miR-596     | MIMAT0003264     | AAGCCUGCCCGCUCUCCGGG     |
| hsa-miR-597-5p  | MIMAT0003265     | UGUGUCACUCGAUGACCACUGU   |
| hsa-miR-598-3p  | MIMAT0003266     | UACGUCAUCGUUGUCAUCGUCA   |
| hsa-miR-599     | MIMAT0003267     | GUUGUGUCAGUUUAUCAAAC     |
| hsa-miR-600     | MIMAT0003268     | ACUACAGACAAGAGCCUUGCUC   |
| hsa-miR-601     | MIMAT0003269     | UGGUCUAGGAUUGUUGGAGGAG   |

| Official symbol | Accession number | Target Sequence           |
|-----------------|------------------|---------------------------|
| hsa-miR-603     | MIMAT0003271     | CACACACUGCAAUUACUUUUGC    |
| hsa-miR-604     | MIMAT0003272     | AGGCUGCGGAAUUCAGGAC       |
| hsa-miR-605-5p  | MIMAT0003273     | UAAAUCCCAUGGUGCCUUCUCCU   |
| hsa-miR-606     | MIMAT0003274     | AAACUACUGAAAAUCAAGAU      |
| hsa-miR-607     | MIMAT0003275     | GUUCAAUCCAGAUCUAUAAC      |
| hsa-miR-608     | MIMAT0003276     | AGGGGUGGUGUUGGGACAGCUCCGU |
| hsa-miR-610     | MIMAT0003278     | UGAGCUAAAUGUGUGCUGGGA     |
| hsa-miR-612     | MIMAT0003280     | GCUGGGCAGGGCUUCUGAGCUCCUU |
| hsa-miR-613     | MIMAT0003281     | AGGAAUGUUCUUCUUUGCC       |
| hsa-miR-614     | MIMAT0003282     | GAACGCCUGUUCUUGCCAGGUGG   |
| hsa-miR-615-3p  | MIMAT0003283     | UCCGAGCCUGGGUCUCCUCUU     |
| hsa-miR-617     | MIMAT0003286     | AGACUUCCAUUUGAAGGUGGC     |
| hsa-miR-619-3p  | MIMAT0003288     | GACCUGGACAUGUUUGUGCCAGU   |
| hsa-miR-620     | MIMAT0003289     | AUGGAGAUAGAUAGAAU         |
| hsa-miR-625-5p  | MIMAT0003294     | AGGGGGAAAGUUCUAUAGUCC     |
| hsa-miR-626     | MIMAT0003295     | AGCUGUCUGAAAAUGUCUU       |
| hsa-miR-627-5p  | MIMAT0003296     | GUGAGUCUCUAAGAAAAGAGGA    |
| hsa-miR-628-3p  | MIMAT0003297     | UCUAGUAAGAGUGGCAGUCGA     |
| hsa-miR-630     | MIMAT0003299     | AGUAUUCUGUACCAGGGAAGGU    |
| hsa-miR-631     | MIMAT0003300     | AGACCUGGCCCAGACCUCAGC     |
| hsa-miR-33b-5p  | MIMAT0003301     | GUGCAUUGCUGUUGCAUUGC      |
| hsa-miR-637     | MIMAT0003307     | ACUGGGGGCUUUCGGGCUCUGCGU  |
| hsa-miR-638     | MIMAT0003308     | AGGGAUCGCGGGCGGGUGGCGCCU  |
| hsa-miR-639     | MIMAT0003309     | AUCGCUGCGGUUGCGAGCGCUGU   |
| hsa-miR-640     | MIMAT0003310     | AUGAUCCAGGAACCUGCCUCU     |
| hsa-miR-641     | MIMAT0003311     | AAAGACAUAGGAUAGAGUCACCUC  |
| hsa-miR-642a-5p | MIMAT0003312     | GUCCUCUCCAAAUGUGUCUUG     |
| hsa-miR-643     | MIMAT0003313     | ACUUGUAUGCUCAGCUCAGGUAG   |
| hsa-miR-644a    | MIMAT0003314     | AGUGUGGCUUUCUAGAGC        |
| hsa-miR-648     | MIMAT0003318     | AAGUGUGCAGGGCACUGGU       |
| hsa-miR-649     | MIMAT0003319     | AAACCUGUGUUGUUCAAGAGUC    |
| hsa-miR-650     | MIMAT0003320     | AGGAGGCAGCGCUCUCAGGAC     |
| hsa-miR-651-5p  | MIMAT0003321     | UUUAGGAUAAGCUUGACUUUUG    |
| hsa-miR-652-3p  | MIMAT0003322     | AAUGGCGCCACUAGGGUUGUG     |
| hsa-miR-548d-3p | MIMAT0003323     | CAAAAACCACAGUUUCUUUUGC    |
| hsa-miR-661     | MIMAT0003324     | UGCCUGGGUCUCUGGCCUGCGCGU  |
| hsa-miR-663a    | MIMAT0003326     | AGGCGGGGCGCCGCGGGACCGC    |

| Official symbol   | Accession number | Target Sequence          |
|-------------------|------------------|--------------------------|
| hsa-miR-449b-5p   | MIMAT0003327     | AGGCAGUGUAUUGUUAGCUGGC   |
| hsa-miR-411-5p    | MIMAT0003329     | UAGUAGACCGUAUAGCGUACG    |
| hsa-miR-654-5p    | MIMAT0003330     | UGGUGGGCCGCAGAACAUGUGC   |
| hsa-miR-655-3p    | MIMAT0003331     | AUAAUACAUGGUUAACCUCUUU   |
| hsa-miR-656-3p    | MIMAT0003332     | AAUAUUUAUCAGUCAACCUCU    |
| hsa-miR-549a      | MIMAT0003333     | UGACAACUAUGGAUGAGCUCU    |
| hsa-miR-660-5p    | MIMAT0003338     | UACCCAUUGCAUUCGGAGUUG    |
| hsa-miR-421       | MIMAT0003339     | AUCAACAGACAUUAAUUGGGCGC  |
| hsa-miR-542-5p    | MIMAT0003340     | UCGGGGAUCAUCAUGUCACGAGA  |
| hsa-miR-363-5p    | MIMAT0003385     | CGGGUGGAUCACGAUGCAAUUU   |
| hsa-miR-542-3p    | MIMAT0003389     | UGUGACAGAUUGAUAACUGAAA   |
| hsa-miR-425-5p    | MIMAT0003393     | AAUGACACGAUCACUCCCGUUGA  |
| hsa-miR-758-3p    | MIMAT0003879     | UUUGUGACCUGGUCCACUAACC   |
| hsa-miR-671-5p    | MIMAT0003880     | AGGAAGCCCUGGAGGGGCUGGAG  |
| hsa-miR-767-5p    | MIMAT0003882     | UGCACCAUGGUUGUCUGAGCAUG  |
| hsa-miR-767-3p    | MIMAT0003883     | UCUGCUCAUACCCCAUGGUUUUCU |
| hsa-miR-454-3p    | MIMAT0003885     | UAGUGCAAUAUUGCUUAUAGGGU  |
| hsa-miR-769-5p    | MIMAT0003886     | UGAGACCUCUGGGUUCUGAGCU   |
| hsa-miR-769-3p    | MIMAT0003887     | CUGGGAUCUCCGGGGUCUUGGUU  |
| hsa-miR-766-3p    | MIMAT0003888     | ACUCCAGCCCCACAGCCUCAGC   |
| hsa-miR-765       | MIMAT0003945     | UGGAGGAGAAGGAAGGUGAUG    |
| hsa-miR-770-5p    | MIMAT0003948     | UCCAGUACCACGUGUCAGGGCCA  |
| hsa-miR-802       | MIMAT0004185     | CAGUAACAAAGAUUCAUCCUUGU  |
| hsa-miR-675-5p    | MIMAT0004284     | UGGUGCGGAGAGGGCCACAGUG   |
| hsa-miR-297       | MIMAT0004450     | AUGUAUGUGUGCAUGUGCAUG    |
| hsa-miR-25-5p     | MIMAT0004498     | AGGCGGAGACUUGGGCAAUUG    |
| hsa-miR-28-3p     | MIMAT0004502     | CACUAGAUUGUGAGCUCCUGGA   |
| hsa-miR-92a-1-5p  | MIMAT0004507     | AGGUUGGGAUCGGUUGCAAUGCU  |
| hsa-miR-139-3p    | MIMAT0004552     | UGGAGACGCGGCCUUGUUGGAGU  |
| hsa-miR-181a-2-3p | MIMAT0004558     | ACCACUGACCGUUGACUGUACC   |
| hsa-miR-196a-3p   | MIMAT0004562     | CGGCAACAAGAAACUGCCUGAG   |
| hsa-miR-199b-3p   | MIMAT0004563     | ACAGUAGUCUGCACAUUGGUUA   |
| hsa-miR-219a-1-3p | MIMAT0004567     | AGAGUUGAGUCUGGACGUCCCG   |
| hsa-miR-221-5p    | MIMAT0004568     | ACCUGGCAUACAAUGUAGAUUU   |
| hsa-miR-140-3p    | MIMAT0004597     | UACCACAGGGUAGAACCACGG    |

| Official symbol   | Accession number | Target Sequence         |
|-------------------|------------------|-------------------------|
| hsa-miR-125a-3p   | MIMAT0004602     | ACAGGUGAGGUUCUUGGGAGCC  |
| hsa-miR-127-5p    | MIMAT0004604     | CUGAAGCUCAGAGGGCUCUGAU  |
| hsa-miR-129-2-3p  | MIMAT0004605     | AAGCCCUUACCCCAAAAAGCAU  |
| hsa-miR-188-3p    | MIMAT0004613     | CUCCCAUAGCAGGGUUUGCA    |
| hsa-miR-193a-5p   | MIMAT0004614     | UGGGUCUUUGCGGGCGAGAUGA  |
| hsa-miR-30c-1-3p  | MIMAT0004674     | CUGGGAGAGGGUUGUUUACUCC  |
| hsa-miR-219a-2-3p | MIMAT0004675     | AGAAUUGUGGCUGGACAUCUGU  |
| hsa-miR-34b-3p    | MIMAT0004676     | CAAUCACUAACUCCACUGCCAU  |
| hsa-miR-34c-3p    | MIMAT0004677     | AAUCACUAACCACACGGCCAGG  |
| hsa-miR-296-3p    | MIMAT0004679     | GAGGGUUGGGUGGAGGCUCUCC  |
| hsa-miR-361-3p    | MIMAT0004682     | UCCCCAGGUGUGAUUCUGAUUU  |
| hsa-miR-362-3p    | MIMAT0004683     | AACACACCUAUUCAAGGAUUCA  |
| hsa-miR-371a-5p   | MIMAT0004687     | ACUCAAACUGUGGGGGCACU    |
| hsa-miR-374a-3p   | MIMAT0004688     | CUUAUCAGAUUGUAUUGUAAUU  |
| hsa-miR-340-5p    | MIMAT0004692     | UUUAUAAGCAAUGAGACUGAUU  |
| hsa-miR-330-5p    | MIMAT0004693     | UCUCUGGGCCUGUGUCUUAGGC  |
| hsa-miR-342-5p    | MIMAT0004694     | AGGGGUGCUAUCUGUGAUUGA   |
| hsa-miR-337-5p    | MIMAT0004695     | GAACGGCUUCAUACAGGAGUU   |
| hsa-miR-323a-5p   | MIMAT0004696     | AGGUGGUCCGUGGCGGUUCGC   |
| hsa-miR-151a-5p   | MIMAT0004697     | UCGAGGAGCUCACAGUCUAGU   |
| hsa-miR-331-5p    | MIMAT0004700     | CUAGGUUAUGGUCCCAGGGAUCC |
| hsa-miR-338-5p    | MIMAT0004701     | AACAAUAUCCUGGUGCUGAGUG  |
| hsa-miR-339-3p    | MIMAT0004702     | UGAGCGCCUCGACGACAGAGCCG |
| hsa-miR-423-5p    | MIMAT0004748     | UGAGGGGCAGAGAGCGAGACUUU |
| hsa-miR-483-5p    | MIMAT0004761     | AAGACGGGAGGAAAGAAGGGAG  |
| hsa-miR-486-3p    | MIMAT0004762     | CGGGGCAGCUCAGUACAGGAU   |
| hsa-miR-488-3p    | MIMAT0004763     | UUGAAAGGCUAUUUCUUGGUC   |
| hsa-miR-490-5p    | MIMAT0004764     | CCAUGGAUCUCCAGGUGGGU    |
| hsa-miR-491-3p    | MIMAT0004765     | CUUAUGCAAGAUUCCCUUCUAC  |
| hsa-miR-146b-3p   | MIMAT0004766     | UGCCCUUGGACUCAGUUCUGG   |
| hsa-miR-193b-5p   | MIMAT0004767     | CGGGGUUUUGAGGGCGAGAUGA  |
| hsa-miR-516a-5p   | MIMAT0004770     | UUCUCGAGGAAAGAAGCACUUUC |
| hsa-miR-499a-3p   | MIMAT0004772     | AACAUCACAGCAAGUCUGUGCU  |
| hsa-miR-500a-5p   | MIMAT0004773     | UAAUCCUUGCUACCUUGGUGAGA |
| hsa-miR-501-3p    | MIMAT0004774     | AAUGCACCCGGGCAAGGAUUCU  |
| hsa-miR-502-3p    | MIMAT0004775     | AAUGCACCUUGGCAAGGAUUCA  |

| Official symbol | Accession number | Target Sequence          |
|-----------------|------------------|--------------------------|
| hsa-miR-513a-3p | MIMAT0004777     | UAAUUUCACCUUUCUGAGAAGG   |
| hsa-miR-508-5p  | MIMAT0004778     | UACUCCAGAGGGCGUCACUCAUG  |
| hsa-miR-509-5p  | MIMAT0004779     | UACUGCAGACAGUGGCAAUCA    |
| hsa-miR-532-3p  | MIMAT0004780     | CCUCCCACACCCAAGGCUUGCA   |
| hsa-miR-455-3p  | MIMAT0004784     | GCAGUCCAUGGGCAUAUACAC    |
| hsa-miR-556-3p  | MIMAT0004793     | AUAUUACCAUUAGCUCAUCUUU   |
| hsa-miR-574-5p  | MIMAT0004795     | UGAGUGUGUGUGUGAGUGUGU    |
| hsa-miR-576-3p  | MIMAT0004796     | AAGAUGUGGAAAAUUUGGAAUC   |
| hsa-miR-582-3p  | MIMAT0004797     | UACUGGUUGAACCAACUGAACC   |
| hsa-miR-589-5p  | MIMAT0004799     | UGAGAACCACGUCUGCUCUGAG   |
| hsa-miR-550a-5p | MIMAT0004800     | AGUGCCUGAGGGAGUAAGAGCCC  |
| hsa-miR-590-3p  | MIMAT0004801     | UAAUUUUUAUGUAUAAGCUAGU   |
| hsa-miR-593-3p  | MIMAT0004802     | UGUCUCUGCUGGGGUUUUCU     |
| hsa-miR-548a-5p | MIMAT0004803     | AAAAGUAAUUGCGAGUUUUACC   |
| hsa-miR-615-5p  | MIMAT0004804     | GGGGGUCCCCGGUGCUCGGAUC   |
| hsa-miR-616-3p  | MIMAT0004805     | AGUCAUUGGAGGGUUUGAGCAG   |
| hsa-miR-548c-5p | MIMAT0004806     | AAAAGUAAUUGCGGUUUUUUGCC  |
| hsa-miR-624-3p  | MIMAT0004807     | CACAAGGUAAUUGGUAAUUACCU  |
| hsa-miR-628-5p  | MIMAT0004809     | AUGCUGACAUAAUUACUAGAGG   |
| hsa-miR-629-5p  | MIMAT0004810     | UGGGUUUACGUUGGGAGAACU    |
| hsa-miR-548d-5p | MIMAT0004812     | AAAAGUAAUUGUGGUUUUUUGCC  |
| hsa-miR-411-3p  | MIMAT0004813     | UAUGUAACACGGUCCACUAACC   |
| hsa-miR-654-3p  | MIMAT0004814     | UAUGUCUGCUGACCAUCACCUU   |
| hsa-miR-671-3p  | MIMAT0004819     | UCCGGUUCUCAGGGCUCCACC    |
| hsa-miR-298     | MIMAT0004901     | AGCAGAAGCAGGGAGGUUCUCCCA |
| hsa-miR-891a-5p | MIMAT0004902     | UGCAACGAACCUGAGCCACUGA   |
| hsa-miR-300     | MIMAT0004903     | UAUACAAGGGCAGACUCUCUCU   |
| hsa-miR-892a    | MIMAT0004907     | CACUGUGUCCUUUCUGCGUAG    |
| hsa-miR-450b-5p | MIMAT0004909     | UUUUGCAAUAUGUUCUGAAUA    |
| hsa-miR-450b-3p | MIMAT0004910     | UUGGGAUCAUUUUGCAUCCAUA   |
| hsa-miR-874-3p  | MIMAT0004911     | CUGCCCUGGCCCGAGGGACCGA   |
| hsa-miR-890     | MIMAT0004912     | UACUUGGAAAGGCAUCAGUUG    |
| hsa-miR-891b    | MIMAT0004913     | UGCAACUUACCUGAGUCAUUGA   |
| hsa-miR-888-5p  | MIMAT0004916     | UACUCAAAAAGCUGUCAGUCA    |
| hsa-miR-892b    | MIMAT0004918     | CACUGGCUCCUUUCUGGGUAGA   |
| hsa-miR-541-3p  | MIMAT0004920     | UGGUGGGCACAGAAUCUGGACU   |
| hsa-miR-889-3p  | MIMAT0004921     | UUAAUAUCGGACAACCAUUGU    |

| Official symbol  | Accession number | Target Sequence          |
|------------------|------------------|--------------------------|
| hsa-miR-875-3p   | MIMAT0004923     | CCUGGAAACACUGAGGUUGUG    |
| hsa-miR-876-5p   | MIMAT0004924     | UGGAUUUCUUUGUGAAUCACCA   |
| hsa-miR-876-3p   | MIMAT0004925     | UGGUGGUUUACAAAGUAAUUCA   |
| hsa-miR-708-5p   | MIMAT0004926     | AAGGAGCUUACAAUCUAGCUGGG  |
| hsa-miR-147b     | MIMAT0004928     | GUGUGCGGAAAUGCUUCUGCUA   |
| hsa-miR-190b     | MIMAT0004929     | UGAUUUGUUUGAUUUGGGUU     |
| hsa-miR-744-5p   | MIMAT0004945     | UGC GGGGCUAGGGCUAACAGCA  |
| hsa-miR-885-5p   | MIMAT0004947     | UCCAUUACACUACCCUGCCUCU   |
| hsa-miR-885-3p   | MIMAT0004948     | AGGCAGCGGGGUGUAGUGGAUA   |
| hsa-miR-877-5p   | MIMAT0004949     | GUAGAGGAGAUGGCGCAGGG     |
| hsa-miR-887-3p   | MIMAT0004951     | GUGAACGGGCGCCAUCCCGAGG   |
| hsa-miR-665      | MIMAT0004952     | ACCAGGAGGCUGAGGCCCCU     |
| hsa-miR-873-5p   | MIMAT0004953     | GCAGGAACUUGUGAGUCUCCU    |
| hsa-miR-543      | MIMAT0004954     | AAACAUUCGCGGUGCACUUCUU   |
| hsa-miR-374b-5p  | MIMAT0004955     | AUAUAAUACAACCUAGCUAAGUG  |
| hsa-miR-760      | MIMAT0004957     | CGGCUCUGGGUCUGUGGGGA     |
| hsa-miR-301b-3p  | MIMAT0004958     | CAGUGCAAUGAUUUGUCAAAAGC  |
| hsa-miR-216b-5p  | MIMAT0004959     | AAAUCUCUGCAGGCAAUUGUGA   |
| hsa-miR-208b-3p  | MIMAT0004960     | AUAAGACGAACAAAAGGUUUGU   |
| hsa-miR-922      | MIMAT0004972     | GCAGCAGAGAAUAGGACUACGUC  |
| hsa-miR-924      | MIMAT0004974     | AGAGUCUUGUGAUGUCUUGC     |
| hsa-miR-509-3-5p | MIMAT0004975     | UACUGCAGACGUGGCAAUCAUG   |
| hsa-miR-933      | MIMAT0004976     | UGUGCGCAGGGAGACCUCUCCC   |
| hsa-miR-934      | MIMAT0004977     | UGUCUACUACUGGAGACACUGG   |
| hsa-miR-935      | MIMAT0004978     | CCAGUUACCGCUUCCGCUACCGC  |
| hsa-miR-936      | MIMAT0004979     | ACAGUAGAGGGAGGAAUCGCAG   |
| hsa-miR-937-3p   | MIMAT0004980     | AUCCGCGCUCUGACUCUCUGCC   |
| hsa-miR-939-5p   | MIMAT0004982     | UGGGGAGCUGAGGCUCUGGGGGUG |
| hsa-miR-940      | MIMAT0004983     | AAGGCAGGGCCCCCGCUCCCC    |
| hsa-miR-941      | MIMAT0004984     | CACCCGGCUGUGUGCACAUGUGC  |
| hsa-miR-942-5p   | MIMAT0004985     | UCUUCUCUGUUUUGGCCAUGUG   |
| hsa-miR-944      | MIMAT0004987     | AAAUUUAUUGUACAUCGGAUGAG  |
| hsa-miR-523-5p   | MIMAT0005449     | CUCUAGAGGGAAGCGCUUUCUG   |
| hsa-miR-518e-5p  | MIMAT0005450     | CUCUAGAGGGAAGCGCUUUCUG   |
| hsa-miR-522-5p   | MIMAT0005451     | CUCUAGAGGGAAGCGCUUUCUG   |
| hsa-miR-519a-5p  | MIMAT0005452     | CUCUAGAGGGAAGCGCUUUCUG   |
| hsa-miR-519b-5p  | MIMAT0005454     | CUCUAGAGGGAAGCGCUUUCUG   |

| Official symbol | Accession number | Target Sequence             |
|-----------------|------------------|-----------------------------|
| hsa-miR-520c-5p | MIMAT0005455     | CUCUAGAGGGAAGCACUUUCUG      |
| hsa-miR-518d-5p | MIMAT0005456     | CUCUAGAGGGAAGCACUUUCUG      |
| hsa-miR-518a-5p | MIMAT0005457     | CUGCAAAGGGAAGCCCUUUC        |
| hsa-miR-1224-5p | MIMAT0005458     | GUGAGGACUCGGGAGGUGG         |
| hsa-miR-1224-3p | MIMAT0005459     | CCCCACCUCCUCUCUCCUCAG       |
| hsa-miR-1226-3p | MIMAT0005577     | UCACCAGCCCUGUGUUCCCUAG      |
| hsa-miR-1228-3p | MIMAT0005583     | UCACACCUGCCUCGCCCCC         |
| hsa-miR-1233-3p | MIMAT0005588     | UGAGCCCUGUCCUCCCGCAG        |
| hsa-miR-1234-3p | MIMAT0005589     | UCGGCCUGACCACCCACCCAC       |
| hsa-miR-1236-3p | MIMAT0005591     | CCUCUUCCCCUUGUCUCUCCAG      |
| hsa-miR-513b-5p | MIMAT0005788     | UUCACAAGGAGGUGUCAUUUUAU     |
| hsa-miR-513c-5p | MIMAT0005789     | UUCUCAAGGAGGUGUCGUUUUAU     |
| hsa-miR-1264    | MIMAT0005791     | CAAGUCUUUUUUGAGCACCUGUU     |
| hsa-miR-320b    | MIMAT0005792     | AAAAGCUGGGUUGAGAGGGCAA      |
| hsa-miR-320c    | MIMAT0005793     | AAAAGCUGGGUUGAGAGGGU        |
| hsa-miR-1296-5p | MIMAT0005794     | UUAGGGCCCUGGCUCCAUCUCC      |
| hsa-miR-1323    | MIMAT0005795     | UCAAAACUGAGGGGCAUUUUCU      |
| hsa-miR-1271-5p | MIMAT0005796     | CUUGGCACCUAGCAAGCACUCA      |
| hsa-miR-1301-3p | MIMAT0005797     | UUGCAGCUGCCUGGGAGUGACUUC    |
| hsa-miR-1185-5p | MIMAT0005798     | AGAGGAUACCCUUUGUAUGUU       |
| hsa-miR-1283    | MIMAT0005799     | UCUACAAAGGAAAGCGCUUUCU      |
| hsa-miR-1298-5p | MIMAT0005800     | UUCAUUCGGCUGUCCAGAUGUA      |
| hsa-miR-1178-3p | MIMAT0005823     | UUGCUCACUGUUCUCCCUAG        |
| hsa-miR-1180-3p | MIMAT0005825     | UUUCCGGCUCGCGUGGGUGUGU      |
| hsa-miR-1183    | MIMAT0005828     | CACUGUAGGUGAUGGUGAGAGUGGGCA |
| hsa-miR-1200    | MIMAT0005863     | CUCCUGAGCCAUUCUGAGCCUC      |
| hsa-miR-1202    | MIMAT0005865     | GUGCCAGCUGCAGUGGGGGAG       |
| hsa-miR-1203    | MIMAT0005866     | CCCGGAGCCAGGAUGCAGCUC       |
| hsa-miR-1204    | MIMAT0005868     | UCGUGGCCUGGUCUCCAUAU        |
| hsa-miR-1205    | MIMAT0005869     | UCUGCAGGGUUUGCUUUGAG        |
| hsa-miR-1206    | MIMAT0005870     | UGUUAUGUAGAUGUUUAAGC        |
| hsa-miR-548e-3p | MIMAT0005874     | AAAAACUGAGACUACUUUUGCA      |
| hsa-miR-548j-5p | MIMAT0005875     | AAAAGUAAUUGCGGUCUUUGGU      |
| hsa-miR-1285-3p | MIMAT0005876     | UCUGGGCAACAAAGUGAGACCU      |
| hsa-miR-1286    | MIMAT0005877     | UGCAGGACCAAGAUGAGCCCU       |
| hsa-miR-1287-5p | MIMAT0005878     | UGCUGGAUCAGUGGUUCGAGUC      |
| hsa-miR-1289    | MIMAT0005879     | UGGAGUCCAGGAAUCUGCAUUUU     |

| Official symbol | Accession number | Target Sequence             |
|-----------------|------------------|-----------------------------|
| hsa-miR-1290    | MIMAT0005880     | UGGAUUUUUGGAUCAGGGA         |
| hsa-miR-1291    | MIMAT0005881     | UGGCCUGACUGAAGACCAGCAGU     |
| hsa-miR-548k    | MIMAT0005882     | AAAAGUACUUGCGGAUUUUGCU      |
| hsa-miR-1293    | MIMAT0005883     | UGGGUGGUCUGGAGAUUUGUC       |
| hsa-miR-1295a   | MIMAT0005885     | UUAGGCCGCAGAUUCUGGGUGA      |
| hsa-miR-1297    | MIMAT0005886     | UUCAAGUAAUUCAGGUG           |
| hsa-miR-1299    | MIMAT0005887     | UUCUGGAAUUCUGUGUGAGGGA      |
| hsa-miR-548l    | MIMAT0005889     | AAAAGUAUUUGCGGGUUUUGUC      |
| hsa-miR-1302    | MIMAT0005890     | UUGGGACAUACUUAUGCUGAAA      |
| hsa-miR-1303    | MIMAT0005891     | UUUAGAGACGGGGUCUUGCUCU      |
| hsa-miR-1304-5p | MIMAT0005892     | UUUGAGGCUACAGUGAGAUGUG      |
| hsa-miR-1305    | MIMAT0005893     | UUUUCAACUCUAAUGGGAGAGA      |
| hsa-miR-1244    | MIMAT0005896     | AAGUAGUUGGUUUGUAUGAGAUGGUU  |
| hsa-miR-1245a   | MIMAT0005897     | AAGUGAUCUAAAGGCCUACAU       |
| hsa-miR-1246    | MIMAT0005898     | AAUGGAUUUUUGGAGCAGG         |
| hsa-miR-1247-5p | MIMAT0005899     | ACCCGUCCGUUCGUCCCCGGA       |
| hsa-miR-1248    | MIMAT0005900     | ACCUUCUUGUAUAAGCACUGUGCUAAA |
| hsa-miR-1249-3p | MIMAT0005901     | ACGCCUUCUUUUUUUCUUA         |
| hsa-miR-1250-5p | MIMAT0005902     | ACGGUGCUGGAUGUGGCCUUU       |
| hsa-miR-1253    | MIMAT0005904     | AGAGAAGAAGAUUCAGCCUGCA      |
| hsa-miR-1254    | MIMAT0005905     | AGCCUGGAAGCUGGAGCCUGCAGU    |
| hsa-miR-1255a   | MIMAT0005906     | AGGAUGAGCAAAGAAAGUAGAUU     |
| hsa-miR-1257    | MIMAT0005908     | AGUGAAUGAUGGGUUCUGACC       |
| hsa-miR-1258    | MIMAT0005909     | AGUUAGGAUUAGGUCGUGGAA       |
| hsa-miR-1260a   | MIMAT0005911     | AUCCCACCUCUGCCACCA          |
| hsa-miR-548g-3p | MIMAT0005912     | AAAACUGUAAUUACUUUUGUAC      |
| hsa-miR-1261    | MIMAT0005913     | AUGGAUAAGGCUUUGGCUU         |
| hsa-miR-1262    | MIMAT0005914     | AUGGGUGAAUUUGUAGAAGGAU      |
| hsa-miR-548n    | MIMAT0005916     | CAAAAGUAAUUGUGGAUUUUGU      |
| hsa-miR-548m    | MIMAT0005917     | CAAAGUAUUUGUGGUUUUUG        |
| hsa-miR-548o-3p | MIMAT0005919     | CCAAAACUGCAGUUACUUUUGC      |
| hsa-miR-1266-5p | MIMAT0005920     | CCUCAGGGCUGUAGAACAGGGCU     |
| hsa-miR-1268a   | MIMAT0005922     | CGGGCGUGGUGGUGGGGG          |
| hsa-miR-1269a   | MIMAT0005923     | CUGGACUGAGCCGUGCUACUGG      |
| hsa-miR-1270    | MIMAT0005924     | CUGGAGAUUUGGAAGAGCUGUGU     |
| hsa-miR-1272    | MIMAT0005925     | GAUGAUGAUGGCAGCAAUUCUGAAA   |
| hsa-miR-548h-5p | MIMAT0005928     | AAAAGUAAUCGCGGUUUUUGUC      |



| Official symbol  | Accession number | Target Sequence           |
|------------------|------------------|---------------------------|
| hsa-miR-1275     | MIMAT0005929     | GUGGGGGAGAGGCUGUC         |
| hsa-miR-1276     | MIMAT0005930     | UAAAGAGCCUGUGGAGACA       |
| hsa-miR-302e     | MIMAT0005931     | UAAGUGCUUCCAUGCUU         |
| hsa-miR-302f     | MIMAT0005932     | UAAUUGCUUCCAUGUUU         |
| hsa-miR-1277-3p  | MIMAT0005933     | UACGUAGAUUAUAUGUAUUUU     |
| hsa-miR-548i     | MIMAT0005935     | AAAAGUAAUUGCGGAUUUUGCC    |
| hsa-miR-1278     | MIMAT0005936     | UAGUACUGUGCAUAUCAUCUAU    |
| hsa-miR-1279     | MIMAT0005937     | UCAUAUUGCUUCUUUCU         |
| hsa-miR-1281     | MIMAT0005939     | UCGCCUCCUCCUCUCCC         |
| hsa-miR-1288-3p  | MIMAT0005942     | UGGACUGCCCUGAUCUGGAGA     |
| hsa-miR-1252-5p  | MIMAT0005944     | AGAAGGAAAUUGAAUUCAUUUA    |
| hsa-miR-1255b-5p | MIMAT0005945     | CGGAUGAGCAAAGAAAGUGGUU    |
| hsa-miR-664a-3p  | MIMAT0005949     | UAUUCAUUUAUCCCCAGCCUACA   |
| hsa-miR-1306-3p  | MIMAT0005950     | ACGUUGGCUCUGGUGGUG        |
| hsa-miR-1307-3p  | MIMAT0005951     | ACUCGCGCUGGCGUCGGUCGUG    |
| hsa-miR-1322     | MIMAT0005953     | GAUGAUGCUGCUGAUGCUG       |
| hsa-miR-1197     | MIMAT0005955     | UAGGACACAUGGUCUACUUCU     |
| hsa-miR-320d     | MIMAT0006764     | AAAAGCUGGGUUGAGAGGA       |
| hsa-miR-1827     | MIMAT0006767     | UGAGGCAGUAGAUUGAAU        |
| hsa-miR-516a-3p  | MIMAT0006778     | UGCUUCCUUUCAGAGGGU        |
| hsa-miR-1469     | MIMAT0007347     | CUCGGCGCGGGGCGCGGGCUCC    |
| hsa-miR-1537-3p  | MIMAT0007399     | AAAACCGUCUAGUUACAGUUGU    |
| hsa-miR-1908-5p  | MIMAT0007881     | CGGCGGGGACGGCGAUUGGUC     |
| hsa-miR-1909-3p  | MIMAT0007883     | CGCAGGGGCCGGGUGCUCACCG    |
| hsa-miR-1910-5p  | MIMAT0007884     | CCAGUCCUGUGCCUGCCGCCU     |
| hsa-miR-1915-3p  | MIMAT0007892     | CCCCAGGGCGACGCGGGCGG      |
| hsa-miR-2113     | MIMAT0009206     | AUUUGUGCUUGGCUCUGUCAC     |
| hsa-miR-1972     | MIMAT0009447     | UCAGGCCAGGCACAGUGGCUCA    |
| hsa-miR-1973     | MIMAT0009448     | ACCGUGCAAAGGUAGCAUA       |
| hsa-miR-1976     | MIMAT0009451     | CCUCCUGCCCUCCUUGCUGU      |
| hsa-miR-2053     | MIMAT0009978     | GUGUUAAUUAACCUUAUUUAC     |
| hsa-miR-2110     | MIMAT0010133     | UUGGGGAAACGGCCGUGAGUG     |
| hsa-miR-151b     | MIMAT0010214     | UCGAGGAGCUCACAGUCU        |
| hsa-miR-449c-5p  | MIMAT0010251     | UAGGCAGUGUAUUGCUAGCGGCUGU |
| hsa-miR-761      | MIMAT0010364     | GCAGCAGGGUGAAACUGACACA    |
| hsa-miR-764      | MIMAT0010367     | GCAGGUGCUCACUUGUCCUCU     |

| Official symbol | Accession number | Target Sequence           |
|-----------------|------------------|---------------------------|
| hsa-miR-2116-5p | MIMAT0011160     | GGUUCUUAGCAUAGGAGGUCU     |
| hsa-miR-2117    | MIMAT0011162     | UGUUCUCUUUGCCAAGGACAG     |
| hsa-miR-548q    | MIMAT0011163     | GCUGGUGCAAAAGUAAUGGCGG    |
| hsa-miR-2278    | MIMAT0011778     | GAGAGCAGUGUGUGUUGCCUGG    |
| hsa-miR-2682-5p | MIMAT0013517     | CAGGCAGUGACUGUUCAGACGUC   |
| hsa-miR-3127-5p | MIMAT0014990     | AUCAGGGCUUGUGGAAUGGGAAG   |
| hsa-miR-3130-3p | MIMAT0014994     | GCUGCACCGGAGACUGGGUAA     |
| hsa-miR-3131    | MIMAT0014996     | UCGAGGACUGGUGGAAGGGCCUU   |
| hsa-miR-378b    | MIMAT0014999     | ACUGGACUUGGAGGCAGAA       |
| hsa-miR-3136-5p | MIMAT0015003     | CUGACUGAAUAGGUAGGGUCAUU   |
| hsa-miR-3140-3p | MIMAT0015008     | AGCUUUUGGAAUUCAGGUAGU     |
| hsa-miR-3144-5p | MIMAT0015014     | AGGGGACCAAAGAGAUUAUAG     |
| hsa-miR-3144-3p | MIMAT0015015     | AUAUACCGUUCGGUCUCUUA      |
| hsa-miR-1273c   | MIMAT0015017     | GGCGACAAAACGAGACCCUGUC    |
| hsa-miR-3147    | MIMAT0015019     | GGUUGGGCAGUGAGGAGGGUGUGA  |
| hsa-miR-548v    | MIMAT0015020     | AGCUACAGUUACUUUUGCACCA    |
| hsa-miR-3151-5p | MIMAT0015024     | GGUGGGGCAAUGGGAUCAGGU     |
| hsa-miR-3074-3p | MIMAT0015027     | GAUAUCAGCUCAGUAGGCACCG    |
| hsa-miR-3158-3p | MIMAT0015032     | AAGGGCUUCCUCUCUGCAGGAC    |
| hsa-miR-3161    | MIMAT0015035     | CUGAUAAAGAACAGAGGCCAGAU   |
| hsa-miR-3164    | MIMAT0015038     | UGUGACUUUAAGGGAAAUGGCG    |
| hsa-miR-1260b   | MIMAT0015041     | AUCCCACCACUGCCACCAU       |
| hsa-miR-3168    | MIMAT0015043     | GAGUUCUACAGUCAGAC         |
| hsa-miR-1193    | MIMAT0015049     | GGGAUGGUAGACCGGUGACGUGC   |
| hsa-miR-323b-3p | MIMAT0015050     | CCCAUACACGGUCGACCUCUU     |
| hsa-miR-3179    | MIMAT0015056     | AGAAGGGGUGAAAUUUAAACGU    |
| hsa-miR-3180-5p | MIMAT0015057     | CUUCCAGACGCUCCGCCCCACGUCG |
| hsa-miR-3180-3p | MIMAT0015058     | UGGGGCGGAGCUUCCGGAGGCC    |
| hsa-miR-3182    | MIMAT0015062     | GCUUCUGUAGUGUAGUC         |
| hsa-miR-3185    | MIMAT0015065     | AGAAGAAGGCGGUCGGUCUGCGG   |
| hsa-miR-3065-5p | MIMAT0015066     | UCAACAAAUCACUGAUGCUGGA    |
| hsa-miR-320e    | MIMAT0015072     | AAAGCUGGGUUGAGAAGG        |
| hsa-miR-3192-5p | MIMAT0015076     | UCUGGGAGGUUGUAGCAGUGGAA   |
| hsa-miR-3195    | MIMAT0015079     | CGCGCCGGGCCCGGGUU         |
| hsa-miR-3196    | MIMAT0015080     | CGGGGCGGCAGGGGCCUC        |
| hsa-miR-514b-5p | MIMAT0015087     | UUCUCAAGAGGGAGGCAAUCAU    |
| hsa-miR-514b-3p | MIMAT0015088     | AUUGACACCUCUGUGAGUGGA     |

| Official symbol  | Accession number | Target Sequence           |
|------------------|------------------|---------------------------|
| hsa-miR-3202     | MIMAT0015089     | UGGAAGGGAGAAGAGCUUUAU     |
| hsa-miR-3065-3p  | MIMAT0015378     | UCAGCACCAGGAUAUUGUUGGAG   |
| hsa-miR-378c     | MIMAT0016847     | ACUGGACUUGGAGUCAGAAGAGUGG |
| hsa-miR-4284     | MIMAT0016915     | GGGCUACAUCACCCAU          |
| hsa-miR-4286     | MIMAT0016916     | ACCCACUCCUGGUACC          |
| hsa-miR-3605-5p  | MIMAT0017981     | UGAGGAUGGAUAGCAAGGAAGCC   |
| hsa-miR-3605-3p  | MIMAT0017982     | CCUCCGUGUUACCUGUCCUCUAG   |
| hsa-miR-3613-5p  | MIMAT0017990     | UGUUGUACUUUUUUUUUUGUUC    |
| hsa-miR-3613-3p  | MIMAT0017991     | ACAAAAAAAAAAGCCCAACCCUUC  |
| hsa-miR-3614-5p  | MIMAT0017992     | CCACUUGGAUCUGAAGGCUGCCC   |
| hsa-miR-3614-3p  | MIMAT0017993     | UAGCCUUCAGAUCUUGGUGUUUU   |
| hsa-miR-3615     | MIMAT0017994     | UCUCUCGGCUCCUCGCGGCUC     |
| hsa-miR-23c      | MIMAT0018000     | AUCACAUUGCCAGUGAUUACCC    |
| hsa-miR-3690     | MIMAT0018119     | ACCUGGACCCAGCGUAGACAAAG   |
| hsa-miR-3180     | MIMAT0018178     | UGGGGCGGAGCUUCCGGAG       |
| hsa-miR-3916     | MIMAT0018190     | AAGAGGAAGAAUGGCUGGUUCUCAG |
| hsa-miR-3918     | MIMAT0018192     | ACAGGGCCGCAGAUGGAGACU     |
| hsa-miR-3150b-3p | MIMAT0018194     | UGAGGAGAUCGUCGAGGUUGG     |
| hsa-miR-3928-3p  | MIMAT0018205     | GGAGGAACCUUGGAGCUUCGGC    |
| hsa-miR-3934-5p  | MIMAT0018349     | UCAGGUGUGGAAACUGAGGCAG    |
| hsa-miR-548y     | MIMAT0018354     | AAAAGUAAUCACUGUUUUUGCC    |
| hsa-miR-374c-5p  | MIMAT0018443     | AUAAUACAACCUGCUAAGUGCU    |
| hsa-miR-548z     | MIMAT0018446     | CAAAAACCGCAAUUACUUUUGCA   |
| hsa-miR-548aa    | MIMAT0018447     | AAAACCACAAUUACUUUUGCACCA  |
| hsa-miR-1268b    | MIMAT0018925     | CGGGCGUGGUGGUGGGGUG       |
| hsa-miR-378d     | MIMAT0018926     | ACUGGACUUGGAGUCAGAAA      |
| hsa-miR-378e     | MIMAT0018927     | ACUGGACUUGGAGUCAGGA       |
| hsa-miR-378f     | MIMAT0018932     | ACUGGACUUGGAGCCAGAAG      |
| hsa-miR-4421     | MIMAT0018934     | ACCUGUCUGUGGAAAGGAGCUA    |
| hsa-miR-378g     | MIMAT0018937     | ACUGGGCUUGGAGUCAGAAG      |
| hsa-miR-4425     | MIMAT0018940     | UGUUGGGAUUCAGCAGGACCAU    |
| hsa-miR-548ad-3p | MIMAT0018946     | GAAAACGACAAUGACUUUUGCA    |
| hsa-miR-4431     | MIMAT0018947     | GCGACUCUGAAAACUAGAAGGU    |
| hsa-miR-4435     | MIMAT0018951     | AUGGCCAGAGCUCACACAGAGG    |
| hsa-miR-4443     | MIMAT0018961     | UUGGAGGCGUGGGUUUU         |
| hsa-miR-4448     | MIMAT0018967     | GGCUCCUUGGUCUAGGGGUA      |

| Official symbol  | Accession number | Target Sequence         |
|------------------|------------------|-------------------------|
| hsa-miR-548ah-5p | MIMAT0018972     | AAAAGUGAUUGCAGUGUUUG    |
| hsa-miR-4451     | MIMAT0018973     | UGGUAGAGCUGAGGACA       |
| hsa-miR-4454     | MIMAT0018976     | GGAUCCGAGUCACGGCACCA    |
| hsa-miR-4455     | MIMAT0018977     | AGGGUGUGUGUGUUUUU       |
| hsa-miR-4458     | MIMAT0018980     | AGAGGUAGGUGUGGAAGAA     |
| hsa-miR-4461     | MIMAT0018983     | GAUUGAGACUAGUAGGGCUAGGC |
| hsa-miR-378h     | MIMAT0018984     | ACUGGACUUGGUGUCAGAUGG   |
| hsa-miR-548ai    | MIMAT0018989     | AAAGGUAAUUGCAGUUUUUCCC  |
| hsa-miR-548ak    | MIMAT0019013     | AAAAGU AACUGCGUUUUUUGA  |
| hsa-miR-4485-3p  | MIMAT0019019     | UAACGGCCGCGGUACCCUAA    |
| hsa-miR-4488     | MIMAT0019022     | AGGGGGCGGGCUCCGGCG      |
| hsa-miR-548al    | MIMAT0019024     | AACGGCAAUGACUUUUGUACCA  |
| hsa-miR-4516     | MIMAT0019053     | GGGAGAAGGGUCGGGGC       |
| hsa-miR-4521     | MIMAT0019058     | GCUAAGGAAGUCCUGUGCUCAG  |
| hsa-miR-1269b    | MIMAT0019059     | CUGGACUGAGCCAUGCUACUGG  |
| hsa-miR-4524a-5p | MIMAT0019062     | AUAGCAGCAUGAACCGUCUCA   |
| hsa-miR-4531     | MIMAT0019070     | AUGGAGAAGGCUUCUGA       |
| hsa-miR-4532     | MIMAT0019071     | CCCCGGGGAGCCCCGGCG      |
| hsa-miR-378i     | MIMAT0019074     | ACUGGACUAGGAGUCAGAAGG   |
| hsa-miR-4536-5p  | MIMAT0019078     | UGUGGUAGAUUAUUGCACGAU   |
| hsa-miR-3140-5p  | MIMAT0019204     | ACCUGAAUUACCAAAGCUUU    |
| hsa-miR-4647     | MIMAT0019709     | GAAGAUGGUGCUGUGCUGAGGAA |
| hsa-miR-219b-3p  | MIMAT0019748     | AGAAUUGCGUUUGGACAAUCAGU |
| hsa-miR-4707-5p  | MIMAT0019807     | GCCCCGGCGCGGGCGGGUUCUGG |
| hsa-miR-4707-3p  | MIMAT0019808     | AGCCCGCCCCAGCCGAGGUUCU  |
| hsa-miR-4741     | MIMAT0019871     | CGGGCUGUCCGGAGGGUCGGCU  |
| hsa-miR-371b-5p  | MIMAT0019892     | ACUCAAAAGAUGGCGGCACUUU  |
| hsa-miR-4755-5p  | MIMAT0019895     | UUUCCCUUCAGAGCCUGGCUUU  |
| hsa-miR-499b-5p  | MIMAT0019897     | ACAGACUUGCUGUGAUGUUCA   |
| hsa-miR-499b-3p  | MIMAT0019898     | AACAUCACUGCAAGUCUUAACA  |
| hsa-miR-1245b-5p | MIMAT0019950     | UAGGCCUUUAGAUCACUUA AA  |
| hsa-miR-1245b-3p | MIMAT0019951     | UCAGAUGAUCUAAAGGCCUAUA  |
| hsa-miR-4787-5p  | MIMAT0019956     | GCGGGGGUGGCGGCGGCAUCCC  |
| hsa-miR-4787-3p  | MIMAT0019957     | GAUGCGCCGCCACUGCCCCGCGC |
| hsa-miR-4792     | MIMAT0019964     | CGGUGAGCGCUCGCUGGC      |

| Official symbol   | Accession number | Target Sequence           |
|-------------------|------------------|---------------------------|
| hsa-miR-642a-3p   | MIMAT0020924     | AGACACAUUUGGAGAGGGAACC    |
| hsa-miR-548ah-3p  | MIMAT0020957     | CAAAAACUGCAGUUACUUUUGC    |
| hsa-miR-4536-3p   | MIMAT0020959     | UCGUGCAUAUAUCUACCACAU     |
| hsa-miR-5001-5p   | MIMAT0021021     | AGGGCUGGACUCAGCGGCGGAGCU  |
| hsa-miR-5001-3p   | MIMAT0021022     | UUCUGCCUCUGUCCAGGUCCUU    |
| hsa-miR-5010-5p   | MIMAT0021043     | AGGGGGAUGGCAGAGCAAAAUU    |
| hsa-miR-5010-3p   | MIMAT0021044     | UUUUGUGUCUCCAUUCCCCAG     |
| hsa-miR-5196-5p   | MIMAT0021128     | AGGGAAGGGGACGAGGGUUGGG    |
| hsa-miR-5196-3p   | MIMAT0021129     | UCAUCCUCGUCUCCUCCAG       |
| hsa-miR-548ar-5p  | MIMAT0022265     | AAAAGUAAUUGCAGUUUUUGC     |
| hsa-miR-548ar-3p  | MIMAT0022266     | UAAAACUGCAGUUUUUUUGC      |
| hsa-miR-664b-5p   | MIMAT0022271     | UGGGCUAAGGGAGAUUGAUUGGGUA |
| hsa-miR-664b-3p   | MIMAT0022272     | UUCAUUUGCCUCCAGCCUACA     |
| hsa-miR-548av-3p  | MIMAT0022304     | AAAACUGCAGUUACUUUUGC      |
| hsa-miR-197-5p    | MIMAT0022691     | CGGGUAGAGAGGGCAGUGGGAGG   |
| hsa-miR-211-3p    | MIMAT0022694     | GCAGGGACAGCAAAGGGGUGC     |
| hsa-miR-301a-5p   | MIMAT0022696     | GCUCUGACUUUAUUGCACUACU    |
| hsa-miR-382-3p    | MIMAT0022697     | AAUCAUUCACGGACAACACUU     |
| hsa-miR-345-3p    | MIMAT0022698     | GCCCUGAACGAGGGGUCUGGAG    |
| hsa-miR-450a-1-3p | MIMAT0022700     | AUUGGGAACAUUUUGCAUGUAU    |
| hsa-miR-506-5p    | MIMAT0022701     | UAUUCAGGAAGGUGUUACUUA     |
| hsa-miR-514a-5p   | MIMAT0022702     | UACUCUGGAGAGUGACAAUCAUG   |
| hsa-miR-539-3p    | MIMAT0022705     | AUCAUACAAGGACAAUUUCUUU    |
| hsa-miR-561-5p    | MIMAT0022706     | AUCAAGGAUCUUAACUUUGCC     |
| hsa-miR-570-5p    | MIMAT0022707     | AAAGGUAAUUGCAGUUUUUCCC    |
| hsa-miR-584-3p    | MIMAT0022708     | UCAGUUCAGGCCAACAGGCU      |
| hsa-miR-652-5p    | MIMAT0022709     | CAACCCUAGGAGAGGGUGCCAUUCA |
| hsa-miR-660-3p    | MIMAT0022711     | ACCUCCUGUGUGCAUGGAUUA     |
| hsa-miR-1271-3p   | MIMAT0022712     | AGUGCCUGCUAUGUGCCAGGCA    |
| hsa-miR-1185-2-3p | MIMAT0022713     | AUAUACAGGGGGAGACUCUCAU    |
| hsa-miR-766-5p    | MIMAT0022714     | AGGAGGAUUUGGUGCUGGUCUU    |
| hsa-miR-873-3p    | MIMAT0022717     | GGAGACUGAUGAGUUCCCGGGA    |
| hsa-miR-1285-5p   | MIMAT0022719     | GAUCUCACUUUGUUGCCCAGG     |
| hsa-miR-1304-3p   | MIMAT0022720     | UCUCACUGUAGCCUCGAACCCC    |
| hsa-miR-548h-3p   | MIMAT0022723     | CAAAAACCGCAAUUACUUUUGCA   |

| Official symbol   | Accession number | Target Sequence          |
|-------------------|------------------|--------------------------|
| hsa-miR-1306-5p   | MIMAT0022726     | CCACCUCCCCUGCAAACGUCCA   |
| hsa-miR-1307-5p   | MIMAT0022727     | UCGACCGGACCUCGACCGGCU    |
| hsa-miR-513c-3p   | MIMAT0022728     | UAAAUUUCACCUUUCUGAGAAGA  |
| hsa-miR-548t-3p   | MIMAT0022730     | AAAAACCACAAUACUUUUGCACCA |
| hsa-miR-548o-5p   | MIMAT0022738     | AAAAGUAAUUGCGGUUUUUGCC   |
| hsa-miR-548am-5p  | MIMAT0022740     | AAAAGUAAUUGCGGUUUUUGCC   |
| hsa-miR-365b-5p   | MIMAT0022833     | AGGGACUUUCAGGGGCAGCUGU   |
| hsa-miR-365b-3p   | MIMAT0022834     | UAAUGCCCCUAAAAUCCUUAU    |
| hsa-miR-1185-1-3p | MIMAT0022838     | AUAUACAGGGGGAGACUCUUAU   |
| hsa-miR-3190-3p   | MIMAT0022839     | UGUGGAAGGUAGACGGCCAGAGA  |
| hsa-miR-98-3p     | MIMAT0022842     | CUAUACAACUACUACUUAUCCC   |
| hsa-miR-376c-5p   | MIMAT0022861     | GGUGGAUAUUCUUAUGUU       |
| hsa-miR-381-5p    | MIMAT0022862     | AGCGAGGUUGCCUUAUGUAUAU   |
| hsa-miR-495-5p    | MIMAT0022924     | GAAGUUGCCAUUGUUAUUUCG    |
| hsa-miR-503-3p    | MIMAT0022925     | GGGGUAUUGUUUCCGUGCCAGG   |
| hsa-miR-376a-2-5p | MIMAT0022928     | GGUAGAUUUCCUUAUGGU       |
| hsa-miR-758-5p    | MIMAT0022929     | GAUGGUUGACCAGAGACACAC    |
| hsa-miR-6503-5p   | MIMAT0025462     | AGGUCUGCAUUCAAAUCCCAGA   |
| hsa-miR-6503-3p   | MIMAT0025463     | GGGACUAGGAUGCAGACCUCC    |
| hsa-miR-6511a-5p  | MIMAT0025478     | CAGGCAGAAGUGGGGCUGACAGG  |
| hsa-miR-6511a-3p  | MIMAT0025479     | CCUCACCAUCCUUCUGCCUGC    |
| hsa-miR-6720-3p   | MIMAT0025851     | CGCGCCUGCAGGAACUGGUAGA   |
| hsa-miR-6721-5p   | MIMAT0025852     | UGGGCAGGGCUUAUUGUAGGAG   |
| hsa-miR-6724-5p   | MIMAT0025856     | CUGGGCCCGCGCGGGCGUGGGG   |
| hsa-miR-210-5p    | MIMAT0026475     | AGCCCCUGCCCACCGCACACUG   |
| hsa-miR-128-1-5p  | MIMAT0026477     | CGGGGCCGUAGCACUGUCUGAGA  |
| hsa-miR-133a-5p   | MIMAT0026478     | AGCUGGUAAAAUGGAACCAAU    |
| hsa-miR-152-5p    | MIMAT0026479     | AGGUUCUGUGAUACACUCCGACU  |
| hsa-miR-134-3p    | MIMAT0026481     | CCUGUGGGCCACCUAGUCACCAA  |
| hsa-miR-190a-3p   | MIMAT0026482     | CUAUUAUCAAACAUUUCU       |
| hsa-miR-370-5p    | MIMAT0026483     | CAGGUCACGUCUCUGCAGUUAC   |
| hsa-miR-328-5p    | MIMAT0026486     | GGGGGGCAGGAGGGGCUCAGGG   |
| hsa-miR-433-5p    | MIMAT0026554     | UACGGUGAGCCUGUCAUUAUUC   |
| hsa-miR-329-5p    | MIMAT0026555     | GAGGUUUUCUGGGUUUCUGUUUC  |
| hsa-miR-494-5p    | MIMAT0026607     | AGGUUGUCCGUGUUGUCUUCUCU  |

| <b>Official symbol</b>                     | <b>Accession number</b> | <b>Target Sequence</b>   |
|--------------------------------------------|-------------------------|--------------------------|
| hsa-miR-181d-3p                            | MIMAT0026608            | CCACCGGGGAUGAAUGUCAC     |
| hsa-miR-504-3p                             | MIMAT0026612            | GGGAGUGCAGGGCAGGGUUUC    |
| hsa-miR-510-3p                             | MIMAT0026613            | AUUGAAACCUCUAAGAGUGGA    |
| hsa-miR-487b-5p                            | MIMAT0026614            | GUGGUUAUCCUGUCCUGUUCG    |
| hsa-miR-579-5p                             | MIMAT0026616            | UCGCGGUUUGUGCCAGAUGACG   |
| hsa-miR-627-3p                             | MIMAT0026623            | UCUUUUCUUUGAGACUCACU     |
| hsa-miR-651-3p                             | MIMAT0026624            | AAAGGAAAGUGUAUCCUAAAAG   |
| hsa-miR-1296-3p                            | MIMAT0026637            | GAGUGGGGCUUCGACCCUAACC   |
| hsa-miR-874-5p                             | MIMAT0026718            | CGGCCCCACGCACCAGGGUAAGA  |
| hsa-miR-887-5p                             | MIMAT0026720            | CUUGGGAGCCUGUUAGACUC     |
| hsa-miR-208b-5p                            | MIMAT0026722            | AAGCUUUUUGCUCGAAUUAUGU   |
| hsa-miR-942-3p                             | MIMAT0026734            | CACAUGGCCGAAACAGAGAAGU   |
| hsa-miR-548e-5p                            | MIMAT0026736            | CAAAAGCAAUCGCGGUUUUUGC   |
| hsa-miR-548j-3p                            | MIMAT0026737            | CAAAAACUGCAUUACUUUUGC    |
| hsa-miR-1287-3p                            | MIMAT0026738            | CUCUAGCCACAGAUGCAGUGAU   |
| hsa-miR-1908-3p                            | MIMAT0026916            | CCGCGCCGCGGCUCCGCCCG     |
| hsa-miR-1910-3p                            | MIMAT0026917            | GAGGCAGAAGCAGGAUGACA     |
| hsa-miR-6728-5p                            | MIMAT0027357            | UUGGGAUGGUAGGACCAGAGGGG  |
| hsa-miR-6732-3p                            | MIMAT0027366            | UAACCCUGUCCUCUCCUCCAG    |
| hsa-miR-450a-2-3p                          | MIMAT0031074            | AUUGGGGACAUUUUGCAUUCAU   |
| hsa-miR-128-2-5p                           | MIMAT0031095            | GGGGGCCGAUACACUGUACGAGA  |
| hsa-miR-7975                               | MIMAT0031178            | AUCCUAGUCACGGCACCA       |
| hsa-miR-203a-5p                            | MIMAT0031890            | AGUGGUUCUUAACAGUUAACAGUU |
| hsa-miR-1-5p                               | MIMAT0031892            | ACAUACUUCUUUAUAUGCCAU    |
| hsa-miR-181b-2-3p                          | MIMAT0031893            | CUCACUGAUCAAUGAAUGCA     |
| hsa-miR-301b-5p                            | MIMAT0032026            | GCUCUGACGAGGUUGCACUACU   |
| hsa-miR-1249-5p                            | MIMAT0032029            | AGGAGGGAGGAGAUGGGCCAAGUU |
| <b>Non-Mammalian Spike In miRNA probes</b> |                         |                          |
| ath-miR159a                                | MIMAT0000177            | UUUGGAUUGAAGGGAGCUCUA    |
| cel-miR-248                                | MIMAT0000304            | AUACACGUGCACGGUAACGCUCA  |
| cel-miR-254                                | MIMAT0000310            | UGCAAUUCUUUCGCGACUGUAGG  |
| osa-miR414                                 | MIMAT0001330            | UCAUCCUCAUCAUCGUCC       |
| osa-miR442                                 | MIMAT0001605            | UGACGUGUAAAUUGCGAGACGAAU |
| <b>Internal Reference Genes</b>            |                         |                          |

| Official symbol | Accession number | Target Sequence                                                                                               |
|-----------------|------------------|---------------------------------------------------------------------------------------------------------------|
| ACTB            | NM_001101.2      | TGCAGAAGGAGATCACTGCCCTGGCACCCAGCACAAATGAAGAT<br>CAAGATCATTGCTCCTCCTGAGCGCAAGTACTCCGTGTGGATCG<br>GCGGCTCCATCCT |
| B2M             | NM_004048.2      | CGGGCATTCTGAAGCTGACAGCATTGGGGCCGAGATGTCTCG<br>CTCCGTGGCCTTAGCTGTGCTCGCGTACTCTCTCTTTCTGGCCT<br>GGAGGCTATCCA    |
| GAPDH           | NM_002046.3      | TCCTCTGTTTCGACAGTCAGCCGCATCTTCTTTTTCGTCGCCAGC<br>CGAGCCACATCGCTCAGACACCATGGGGAAGGTGAAGGTCGG<br>AGTCAACGGATT   |
| RPL19           | NM_000981.3      | CCAATGCCCCGAATGCCAGAGAAGGTCACATGGATGAGGAGAA<br>TGAGGATTTTTCGCCGGCTGCTCAGAAGATACCGTGAATCTAA<br>GAAGATCGATCGCCA |
| RPLP0           | NM_001002.3      | CGAAATGTTTCATTGTGGGAGCAGACAATGTGGGCTCCAAGCA<br>GATGCAGCAGATCCGCATGTCCCTTCGCGGGAAGGCTGTGGTG<br>CTGATGGGCAAGAA  |
|                 |                  |                                                                                                               |



**eTable 2. Difference in expression levels of 91 miRNAs between children with and without PPCS across the three timepoints\***

| <b>miRNA</b>                    | <b>Unadjusted P-value</b> | <b>Adjusted P-value<br/>(Bonferroni<br/>Correction)</b> | <b>Adjusted P-value<br/>(False Discovery Rate<br/>Correction)</b> |
|---------------------------------|---------------------------|---------------------------------------------------------|-------------------------------------------------------------------|
| hsa-miR-548y                    | 0.00001                   | 0.00091                                                 | 0.00015                                                           |
| hsa-miR-585-3p                  | 0.00001                   | 0.00091                                                 | 0.00015                                                           |
| hsa-miR-378h                    | 0.00001                   | 0.00091                                                 | 0.00015                                                           |
| hsa-miR-1323                    | 0.00001                   | 0.00091                                                 | 0.00015                                                           |
| hsa-miR-183-5p                  | 0.00001                   | 0.00091                                                 | 0.00015                                                           |
| hsa-miR-199a-3p+hsa-miR-199b-3p | 0.00001                   | 0.00091                                                 | 0.00015                                                           |
| hsa-miR-301a-5p                 | 0.00011                   | 0.01039                                                 | 0.00148                                                           |
| hsa-miR-626                     | 0.00021                   | 0.0195                                                  | 0.00244                                                           |
| hsa-miR-203a-5p                 | 0.00032                   | 0.0287                                                  | 0.00319                                                           |
| hsa-miR-888-5p                  | 0.00057                   | 0.05178                                                 | 0.00518                                                           |
| hsa-miR-548e-5p                 | 0.00084                   | 0.07659                                                 | 0.00696                                                           |
| hsa-miR-200a-3p                 | 0.00104                   | 0.0947                                                  | 0.00789                                                           |
| hsa-miR-95-3p                   | 0.00144                   | 0.13136                                                 | 0.0101                                                            |
| hsa-miR-639                     | 0.00864                   | 0.78652                                                 | 0.05618                                                           |
| hsa-miR-1262                    | 0.01254                   | 1                                                       | 0.07209                                                           |
| hsa-miR-342-3p                  | 0.01267                   | 1                                                       | 0.07209                                                           |
| hsa-miR-922                     | 0.01737                   | 1                                                       | 0.09088                                                           |
| hsa-miR-1305                    | 0.01798                   | 1                                                       | 0.09088                                                           |
| hsa-miR-223-3p                  | 0.02244                   | 1                                                       | 0.10531                                                           |
| hsa-miR-378i                    | 0.02315                   | 1                                                       | 0.10531                                                           |
| hsa-miR-34a-5p                  | 0.031                     | 1                                                       | 0.13432                                                           |
| hsa-miR-1290                    | 0.03475                   | 1                                                       | 0.14376                                                           |
| hsa-miR-423-5p                  | 0.04459                   | 1                                                       | 0.17063                                                           |
| hsa-miR-191-5p                  | 0.045                     | 1                                                       | 0.17063                                                           |
| hsa-miR-30e-5p                  | 0.04875                   | 1                                                       | 0.17064                                                           |
| hsa-miR-125b-5p                 | 0.05088                   | 1                                                       | 0.17064                                                           |
| hsa-miR-664a-3p                 | 0.0516                    | 1                                                       | 0.17064                                                           |
| hsa-miR-106b-5p                 | 0.0525                    | 1                                                       | 0.17064                                                           |
| hsa-miR-1285-5p                 | 0.06022                   | 1                                                       | 0.18896                                                           |
| hsa-miR-29a-3p                  | 0.072                     | 1                                                       | 0.2184                                                            |
| hsa-miR-93-5p                   | 0.08365                   | 1                                                       | 0.24555                                                           |
| hsa-miR-28-5p                   | 0.09366                   | 1                                                       | 0.26342                                                           |
| hsa-let-7b-5p                   | 0.09553                   | 1                                                       | 0.26342                                                           |
| hsa-miR-148a-3p                 | 0.10501                   | 1                                                       | 0.28106                                                           |
| hsa-miR-4516                    | 0.12467                   | 1                                                       | 0.32414                                                           |
| hsa-miR-140-5p                  | 0.14174                   | 1                                                       | 0.35026                                                           |

|                               |         |   |         |
|-------------------------------|---------|---|---------|
| hsa-let-7a-5p                 | 0.14241 | 1 | 0.35026 |
| hsa-miR-1973                  | 0.14714 | 1 | 0.35235 |
| hsa-miR-181a-5p               | 0.1618  | 1 | 0.37712 |
| hsa-miR-361-5p                | 0.16577 | 1 | 0.37712 |
| hsa-miR-26b-5p                | 0.17017 | 1 | 0.37769 |
| hsa-miR-598-3p                | 0.18834 | 1 | 0.40195 |
| hsa-miR-186-5p                | 0.18993 | 1 | 0.40195 |
| hsa-miR-29b-3p                | 0.21236 | 1 | 0.42621 |
| hsa-miR-612                   | 0.21284 | 1 | 0.42621 |
| hsa-miR-15b-5p                | 0.22252 | 1 | 0.42621 |
| hsa-miR-451a                  | 0.2228  | 1 | 0.42621 |
| hsa-miR-23a-3p                | 0.22482 | 1 | 0.42621 |
| hsa-miR-4454+hsa-miR-7975     | 0.23355 | 1 | 0.43373 |
| hsa-miR-1972                  | 0.24038 | 1 | 0.43749 |
| hsa-miR-20a-5p+hsa-miR-20b-5p | 0.24593 | 1 | 0.43881 |
| hsa-miR-142-3p                | 0.26561 | 1 | 0.46481 |
| hsa-miR-16-5p                 | 0.27645 | 1 | 0.47467 |
| hsa-miR-200c-3p               | 0.29362 | 1 | 0.4948  |
| hsa-miR-2116-5p               | 0.31494 | 1 | 0.51947 |
| hsa-miR-221-3p                | 0.31967 | 1 | 0.51947 |
| hsa-miR-148b-3p               | 0.33743 | 1 | 0.52139 |
| hsa-miR-98-5p                 | 0.34034 | 1 | 0.52139 |
| hsa-miR-200b-3p               | 0.34192 | 1 | 0.52139 |
| hsa-miR-150-5p                | 0.34377 | 1 | 0.52139 |
| hsa-let-7c-5p                 | 0.36431 | 1 | 0.53669 |
| hsa-let-7d-5p                 | 0.36566 | 1 | 0.53669 |
| hsa-miR-363-3p                | 0.39772 | 1 | 0.57161 |
| hsa-miR-30d-5p                | 0.40201 | 1 | 0.57161 |
| hsa-miR-205-5p                | 0.41466 | 1 | 0.58052 |
| hsa-miR-106a-5p+hsa-miR-17-5p | 0.44389 | 1 | 0.61203 |
| hsa-miR-25-3p                 | 0.47458 | 1 | 0.63612 |
| hsa-miR-24-3p                 | 0.47534 | 1 | 0.63612 |
| hsa-miR-6721-5p               | 0.51801 | 1 | 0.67833 |
| hsa-let-7i-5p                 | 0.52179 | 1 | 0.67833 |
| hsa-miR-21-5p                 | 0.53613 | 1 | 0.68715 |
| hsa-miR-23b-3p                | 0.57456 | 1 | 0.72618 |
| hsa-miR-4284                  | 0.64314 | 1 | 0.79069 |
| hsa-miR-203a-3p               | 0.65019 | 1 | 0.79069 |
| hsa-miR-107                   | 0.65167 | 1 | 0.79069 |
| hsa-miR-141-3p                | 0.66772 | 1 | 0.79261 |
| hsa-miR-579-3p                | 0.67067 | 1 | 0.79261 |
| hsa-miR-1246                  | 0.7334  | 1 | 0.85564 |
| hsa-miR-15a-5p                | 0.78385 | 1 | 0.88569 |

|                 |         |   |         |
|-----------------|---------|---|---------|
| hsa-miR-630     | 0.79449 | 1 | 0.88569 |
| hsa-let-7g-5p   | 0.80383 | 1 | 0.88569 |
| hsa-miR-130a-3p | 0.81686 | 1 | 0.88569 |
| hsa-miR-222-3p  | 0.8232  | 1 | 0.88569 |
| hsa-miR-374a-5p | 0.82576 | 1 | 0.88569 |
| hsa-miR-1260a   | 0.8273  | 1 | 0.88569 |
| hsa-miR-26a-5p  | 0.9004  | 1 | 0.94515 |
| hsa-miR-99a-5p  | 0.9036  | 1 | 0.94515 |
| hsa-miR-873-3p  | 0.91541 | 1 | 0.94661 |
| hsa-miR-4286    | 0.96223 | 1 | 0.98385 |
| hsa-miR-22-3p   | 0.97939 | 1 | 0.98423 |
| hsa-miR-575     | 0.98423 | 1 | 0.98423 |

\* Results based on longitudinal models with main effects of time and presence of PPCS

| <b>miRNA ID</b> | <b>Gene Symbol</b> | <b>Validated miRTarBase ID</b> |
|-----------------|--------------------|--------------------------------|
| hsa-miR-1323    | AAGAB              | MIRT762523                     |
| hsa-miR-1323    | ADCYAP1            | MIRT639087                     |
| hsa-miR-1323    | ARL6IP1            | MIRT762524                     |
| hsa-miR-1323    | ATP8B3             | MIRT541672                     |
| hsa-miR-1323    | BIRC5              | MIRT509853                     |
| hsa-miR-1323    | CDH1               | MIRT438026                     |
| hsa-miR-1323    | CLIC4              | MIRT065625                     |
| hsa-miR-1323    | DAB2               | MIRT478462                     |
| hsa-miR-1323    | DCP1A              | MIRT783741                     |
| hsa-miR-1323    | DDX6               | MIRT538114                     |
| hsa-miR-1323    | EIF4EBP2           | MIRT762526                     |
| hsa-miR-1323    | EXPH5              | MIRT762527                     |
| hsa-miR-1323    | GJD2               | MIRT657867                     |
| hsa-miR-1323    | GNPTAB             | MIRT557579                     |
| hsa-miR-1323    | HMG2               | MIRT762530                     |
| hsa-miR-1323    | HNRNPC             | MIRT762531                     |
| hsa-miR-1323    | KLF10              | MIRT172130                     |
| hsa-miR-1323    | MAMLD1             | MIRT762532                     |
| hsa-miR-1323    | MOCOS              | MIRT531968                     |
| hsa-miR-1323    | MTA1               | MIRT694367                     |
| hsa-miR-1323    | MTMR9              | MIRT783742                     |
| hsa-miR-1323    | PEG10              | MIRT547156                     |
| hsa-miR-1323    | PLEKHG7            | MIRT610948                     |
| hsa-miR-1323    | PTBP3              | MIRT630580                     |
| hsa-miR-1323    | RESF1              | MIRT664056                     |
| hsa-miR-1323    | RLIM               | MIRT534711                     |
| hsa-miR-1323    | RNF115             | MIRT641958                     |
| hsa-miR-1323    | SCIN               | MIRT504629                     |
| hsa-miR-1323    | SH3PXD2A           | MIRT653869                     |
| hsa-miR-1323    | SPRY1              | MIRT539973                     |
| hsa-miR-1323    | TERF2IP            | MIRT490142                     |
| hsa-miR-1323    | TRAPPC8            | MIRT652225                     |
| hsa-miR-1323    | YIPF4              | MIRT443743                     |
| hsa-miR-1323    | ZNF585B            | MIRT525963                     |
| hsa-miR-1323    | ZNF772             | MIRT545799                     |
| hsa-miR-183-5p  | ABCC10             | MIRT047155                     |
| hsa-miR-183-5p  | ABRAXAS2           | MIRT047107                     |
| hsa-miR-183-5p  | ACP6               | MIRT645996                     |
| hsa-miR-183-5p  | ARHGAP21           | MIRT047126                     |
| hsa-miR-183-5p  | ARHGEF5            | MIRT047144                     |
| hsa-miR-183-5p  | BRWD1              | MIRT705229                     |
| hsa-miR-183-5p  | BTA1               | MIRT047143                     |

|                |          |            |
|----------------|----------|------------|
| hsa-miR-183-5p | C18orf25 | MIRT047073 |
| hsa-miR-183-5p | C5orf24  | MIRT047162 |
| hsa-miR-183-5p | CAPZA1   | MIRT763160 |
| hsa-miR-183-5p | CCNB1    | MIRT047127 |
| hsa-miR-183-5p | CCND1    | MIRT024995 |
| hsa-miR-183-5p | CELF1    | MIRT572175 |
| hsa-miR-183-5p | CR1      | MIRT047066 |
| hsa-miR-183-5p | CSNK2A1  | MIRT047136 |
| hsa-miR-183-5p | CYB5D2   | MIRT047145 |
| hsa-miR-183-5p | DBT      | MIRT676869 |
| hsa-miR-183-5p | DDAH1    | MIRT558453 |
| hsa-miR-183-5p | DKK3     | MIRT053048 |
| hsa-miR-183-5p | DNTTIP2  | MIRT763161 |
| hsa-miR-183-5p | DOCK1    | MIRT047082 |
| hsa-miR-183-5p | DSN1     | MIRT763162 |
| hsa-miR-183-5p | EGR1     | MIRT006540 |
| hsa-miR-183-5p | EIF4A3   | MIRT047149 |
| hsa-miR-183-5p | EIF4EBP2 | MIRT658779 |
| hsa-miR-183-5p | ELAC2    | MIRT047119 |
| hsa-miR-183-5p | ERBIN    | MIRT703885 |
| hsa-miR-183-5p | ERC1     | MIRT024998 |
| hsa-miR-183-5p | ERG28    | MIRT047164 |
| hsa-miR-183-5p | FAT2     | MIRT047135 |
| hsa-miR-183-5p | FBXO32   | MIRT240100 |
| hsa-miR-183-5p | FEN1     | MIRT047080 |
| hsa-miR-183-5p | FNTB     | MIRT047154 |
| hsa-miR-183-5p | FOXN2    | MIRT047161 |
| hsa-miR-183-5p | GLO1     | MIRT047098 |
| hsa-miR-183-5p | GLUL     | MIRT025018 |
| hsa-miR-183-5p | GNL3     | MIRT047156 |
| hsa-miR-183-5p | GP2      | MIRT672296 |
| hsa-miR-183-5p | GSPT1    | MIRT047129 |
| hsa-miR-183-5p | GUCD1    | MIRT047169 |
| hsa-miR-183-5p | HARS1    | MIRT047138 |
| hsa-miR-183-5p | HIPK2    | MIRT047166 |
| hsa-miR-183-5p | HSP90AA1 | MIRT047124 |
| hsa-miR-183-5p | HSPA13   | MIRT547871 |
| hsa-miR-183-5p | HYOU1    | MIRT047102 |
| hsa-miR-183-5p | IGF1R    | MIRT025009 |
| hsa-miR-183-5p | INSIG1   | MIRT047148 |
| hsa-miR-183-5p | ITGA8    | MIRT047150 |
| hsa-miR-183-5p | ITPKB    | MIRT047075 |
| hsa-miR-183-5p | KCNS2    | MIRT719182 |

|                |         |            |
|----------------|---------|------------|
| hsa-miR-183-5p | KCTD15  | MIRT513849 |
| hsa-miR-183-5p | KIF2A   | MIRT004016 |
| hsa-miR-183-5p | KLHL23  | MIRT047139 |
| hsa-miR-183-5p | KLRD1   | MIRT527794 |
| hsa-miR-183-5p | KNTC1   | MIRT047167 |
| hsa-miR-183-5p | KY      | MIRT526274 |
| hsa-miR-183-5p | LARS1   | MIRT047117 |
| hsa-miR-183-5p | LENG8   | MIRT047171 |
| hsa-miR-183-5p | LRP6    | MIRT052934 |
| hsa-miR-183-5p | LRRC58  | MIRT354492 |
| hsa-miR-183-5p | LYPLA1  | MIRT047071 |
| hsa-miR-183-5p | MARF1   | MIRT047170 |
| hsa-miR-183-5p | MBD4    | MIRT501918 |
| hsa-miR-183-5p | MCM4    | MIRT047147 |
| hsa-miR-183-5p | MDM4    | MIRT334810 |
| hsa-miR-183-5p | METTL2B | MIRT664085 |
| hsa-miR-183-5p | MIPOL1  | MIRT723431 |
| hsa-miR-183-5p | MORF4L1 | MIRT541184 |
| hsa-miR-183-5p | MRTFA   | MIRT047070 |
| hsa-miR-183-5p | MRTFB   | MIRT566790 |
| hsa-miR-183-5p | MSH2    | MIRT047085 |
| hsa-miR-183-5p | MTUS1   | MIRT047094 |
| hsa-miR-183-5p | MYBBP1A | MIRT047122 |
| hsa-miR-183-5p | MYCBP2  | MIRT047123 |
| hsa-miR-183-5p | MYO10   | MIRT047146 |
| hsa-miR-183-5p | NEO1    | MIRT047083 |
| hsa-miR-183-5p | NOTCH2  | MIRT025026 |
| hsa-miR-183-5p | NR3C1   | MIRT378074 |
| hsa-miR-183-5p | P4HB    | MIRT047151 |
| hsa-miR-183-5p | PAK4    | MIRT642243 |
| hsa-miR-183-5p | PDP2    | MIRT632602 |
| hsa-miR-183-5p | PEAK1   | MIRT025011 |
| hsa-miR-183-5p | PFKFB3  | MIRT790135 |
| hsa-miR-183-5p | PGM2L1  | MIRT712309 |
| hsa-miR-183-5p | PITPNM3 | MIRT738181 |
| hsa-miR-183-5p | PLEKHB2 | MIRT535164 |
| hsa-miR-183-5p | PLEKHM1 | MIRT047158 |
| hsa-miR-183-5p | POGLUT3 | MIRT047165 |
| hsa-miR-183-5p | POLH    | MIRT047103 |
| hsa-miR-183-5p | PPRC1   | MIRT047060 |
| hsa-miR-183-5p | PREB    | MIRT047099 |
| hsa-miR-183-5p | PSMD13  | MIRT047134 |
| hsa-miR-183-5p | PTP4A2  | MIRT047091 |

|                |          |            |
|----------------|----------|------------|
| hsa-miR-183-5p | PTPN11   | MIRT047153 |
| hsa-miR-183-5p | RAB5B    | MIRT047065 |
| hsa-miR-183-5p | RALGDS   | MIRT047157 |
| hsa-miR-183-5p | RDH11    | MIRT047120 |
| hsa-miR-183-5p | REV3L    | MIRT025031 |
| hsa-miR-183-5p | RIF1     | MIRT047132 |
| hsa-miR-183-5p | RNF41    | MIRT025017 |
| hsa-miR-183-5p | RPAP2    | MIRT047058 |
| hsa-miR-183-5p | RPL7L1   | MIRT503543 |
| hsa-miR-183-5p | RTN4     | MIRT024991 |
| hsa-miR-183-5p | SENP1    | MIRT025028 |
| hsa-miR-183-5p | SHISA2   | MIRT047100 |
| hsa-miR-183-5p | SLC18B1  | MIRT570108 |
| hsa-miR-183-5p | SLC25A25 | MIRT467850 |
| hsa-miR-183-5p | SLC31A1  | MIRT047052 |
| hsa-miR-183-5p | SLC35E2B | MIRT645096 |
| hsa-miR-183-5p | SMG1     | MIRT467529 |
| hsa-miR-183-5p | SOCS6    | MIRT735272 |
| hsa-miR-183-5p | SRSF10   | MIRT047131 |
| hsa-miR-183-5p | STK33    | MIRT025022 |
| hsa-miR-183-5p | SUCO     | MIRT485071 |
| hsa-miR-183-5p | TERF2    | MIRT630047 |
| hsa-miR-183-5p | THOC2    | MIRT047168 |
| hsa-miR-183-5p | TMED7    | MIRT510657 |
| hsa-miR-183-5p | TMEM170B | MIRT565335 |
| hsa-miR-183-5p | TMEM245  | MIRT047061 |
| hsa-miR-183-5p | TNRC6B   | MIRT025025 |
| hsa-miR-183-5p | TPRG1L   | MIRT047125 |
| hsa-miR-183-5p | TRAF4    | MIRT047104 |
| hsa-miR-183-5p | TRIM37   | MIRT047093 |
| hsa-miR-183-5p | TRIM71   | MIRT533470 |
| hsa-miR-183-5p | TRO      | MIRT047116 |
| hsa-miR-183-5p | TSKU     | MIRT500671 |
| hsa-miR-183-5p | TSR1     | MIRT047141 |
| hsa-miR-183-5p | UBP1     | MIRT025006 |
| hsa-miR-183-5p | UBXN7    | MIRT047055 |
| hsa-miR-183-5p | UCHL3    | MIRT047087 |
| hsa-miR-183-5p | UQCRC1   | MIRT047130 |
| hsa-miR-183-5p | USP19    | MIRT047096 |
| hsa-miR-183-5p | USP22    | MIRT047140 |
| hsa-miR-183-5p | USP8     | MIRT047051 |
| hsa-miR-183-5p | WDR26    | MIRT271532 |
| hsa-miR-183-5p | WDR33    | MIRT723492 |

|                                 |           |            |
|---------------------------------|-----------|------------|
| hsa-miR-183-5p                  | WDR53     | MIRT047121 |
| hsa-miR-183-5p                  | YY1       | MIRT533067 |
| hsa-miR-183-5p                  | ZC3H4     | MIRT025021 |
| hsa-miR-183-5p                  | ZFAT      | MIRT047133 |
| hsa-miR-183-5p                  | ZFHX4     | MIRT047086 |
| hsa-miR-183-5p                  | ZFPM1     | MIRT437880 |
| hsa-miR-183-5p                  | ZNF24     | MIRT708282 |
| hsa-miR-183-5p                  | ZNF621    | MIRT619743 |
| hsa-miR-199a-3p_hsa-miR-199b-3p | CCDC80    | MIRT696977 |
| hsa-miR-199a-3p_hsa-miR-199b-3p | CCNL1     | MIRT006586 |
| hsa-miR-199a-3p_hsa-miR-199b-3p | CSNK1A1   | MIRT558557 |
| hsa-miR-199a-3p_hsa-miR-199b-3p | FGF2      | MIRT557866 |
| hsa-miR-199a-3p_hsa-miR-199b-3p | FLT1      | MIRT735200 |
| hsa-miR-199a-3p_hsa-miR-199b-3p | FOXA2     | MIRT735287 |
| hsa-miR-199a-3p_hsa-miR-199b-3p | HGF       | MIRT054477 |
| hsa-miR-199a-3p_hsa-miR-199b-3p | KDR       | MIRT735201 |
| hsa-miR-199a-3p_hsa-miR-199b-3p | LIN54     | MIRT474145 |
| hsa-miR-199a-3p_hsa-miR-199b-3p | MAPK9     | MIRT003982 |
| hsa-miR-199a-3p_hsa-miR-199b-3p | MET       | MIRT001969 |
| hsa-miR-199a-3p_hsa-miR-199b-3p | MTOR      | MIRT026023 |
| hsa-miR-199a-3p_hsa-miR-199b-3p | PAK4      | MIRT733785 |
| hsa-miR-199a-3p_hsa-miR-199b-3p | SMYD4     | MIRT763625 |
| hsa-miR-199a-3p_hsa-miR-199b-3p | SOD2      | MIRT442903 |
| hsa-miR-199a-3p_hsa-miR-199b-3p | TFAM      | MIRT731449 |
| hsa-miR-199a-3p_hsa-miR-199b-3p | TSPAN3    | MIRT553306 |
| hsa-miR-199a-3p_hsa-miR-199b-3p | ZXDB      | MIRT462875 |
| hsa-miR-199a-3p_hsa-miR-199b-3p | CCDC80    | MIRT696976 |
| hsa-miR-199a-3p_hsa-miR-199b-3p | CSNK1A1   | MIRT558556 |
| hsa-miR-199a-3p_hsa-miR-199b-3p | FGF2      | MIRT557867 |
| hsa-miR-199a-3p_hsa-miR-199b-3p | LIN54     | MIRT474143 |
| hsa-miR-199a-3p_hsa-miR-199b-3p | PAK4      | MIRT733786 |
| hsa-miR-199a-3p_hsa-miR-199b-3p | SMYD4     | MIRT763636 |
| hsa-miR-199a-3p_hsa-miR-199b-3p | SOD2      | MIRT442902 |
| hsa-miR-199a-3p_hsa-miR-199b-3p | TSPAN3    | MIRT553305 |
| hsa-miR-199a-3p_hsa-miR-199b-3p | ZXDB      | MIRT462874 |
| hsa-miR-200a-3p                 | BICRAL    | MIRT710918 |
| hsa-miR-200a-3p                 | EGFR      | MIRT735444 |
| hsa-miR-200a-3p                 | ERBIN     | MIRT020347 |
| hsa-miR-200a-3p                 | GATA6     | MIRT004006 |
| hsa-miR-200a-3p                 | HMGB1     | MIRT735283 |
| hsa-miR-200a-3p                 | KEAP1     | MIRT006704 |
| hsa-miR-200a-3p                 | KIAA1549L | MIRT573383 |
| hsa-miR-200a-3p                 | MAPK14    | MIRT006423 |



|                 |         |            |
|-----------------|---------|------------|
| hsa-miR-200a-3p | OGT     | MIRT176071 |
| hsa-miR-200a-3p | PSMD2   | MIRT004400 |
| hsa-miR-200a-3p | RBM28   | MIRT696748 |
| hsa-miR-200a-3p | RUSF1   | MIRT738760 |
| hsa-miR-200a-3p | SLC35D1 | MIRT554194 |
| hsa-miR-200a-3p | SMAD2   | MIRT007290 |
| hsa-miR-200a-3p | TFAM    | MIRT053166 |
| hsa-miR-200a-3p | ZEB1    | MIRT002480 |
| hsa-miR-203a-5p | CACNA1A | MIRT784133 |
| hsa-miR-203a-5p | COX20   | MIRT515224 |
| hsa-miR-203a-5p | CRKL    | MIRT738806 |
| hsa-miR-203a-5p | DOCK4   | MIRT524029 |
| hsa-miR-203a-5p | MMP2    | MIRT734404 |
| hsa-miR-203a-5p | MYO10   | MIRT656037 |
| hsa-miR-203a-5p | NWD1    | MIRT707118 |
| hsa-miR-203a-5p | PTBP2   | MIRT498462 |
| hsa-miR-203a-5p | TSC22D2 | MIRT465106 |
| hsa-miR-203a-5p | ZDHHC9  | MIRT763698 |
| hsa-miR-203a-5p | ZNF28   | MIRT643512 |
| hsa-miR-301a-5p | CDK6    | MIRT479452 |
| hsa-miR-301a-5p | ERBB3   | MIRT719394 |
| hsa-miR-301a-5p | MXD1    | MIRT556040 |
| hsa-miR-301a-5p | PSG4    | MIRT724766 |
| hsa-miR-301a-5p | RREB1   | MIRT699978 |
| hsa-miR-301a-5p | SKIL    | MIRT699517 |
| hsa-miR-301a-5p | SPATS2  | MIRT617242 |
| hsa-miR-301a-5p | SPECC1L | MIRT739618 |
| hsa-miR-301a-5p | ZNF544  | MIRT118176 |
| hsa-miR-378h    | AKT1    | MIRT543139 |
| hsa-miR-378h    | CYP20A1 | MIRT529214 |
| hsa-miR-378h    | ESYT2   | MIRT537576 |
| hsa-miR-378h    | HIPK3   | MIRT725446 |
| hsa-miR-378h    | KCNJ6   | MIRT495440 |
| hsa-miR-378h    | LGSN    | MIRT692968 |
| hsa-miR-378h    | MYRF    | MIRT655996 |
| hsa-miR-378h    | PRKD2   | MIRT525109 |
| hsa-miR-378h    | RAP1B   | MIRT554923 |
| hsa-miR-378h    | RDH11   | MIRT767528 |
| hsa-miR-378h    | REST    | MIRT469372 |
| hsa-miR-378h    | TGFB2   | MIRT652733 |
| hsa-miR-378h    | TXNL1   | MIRT520413 |
| hsa-miR-378h    | WDR33   | MIRT723498 |
| hsa-miR-378h    | WTAP    | MIRT564969 |

|                 |          |            |
|-----------------|----------|------------|
| hsa-miR-378h    | YY1      | MIRT742772 |
| hsa-miR-378h    | ZNF609   | MIRT463101 |
| hsa-miR-548e-5p | CREG2    | MIRT615787 |
| hsa-miR-548e-5p | DIO2     | MIRT628266 |
| hsa-miR-548e-5p | EXOC5    | MIRT548295 |
| hsa-miR-548e-5p | GDNF     | MIRT559411 |
| hsa-miR-548e-5p | GPR180   | MIRT190192 |
| hsa-miR-548e-5p | NCOA1    | MIRT655971 |
| hsa-miR-548e-5p | NFATC3   | MIRT566645 |
| hsa-miR-548e-5p | SHOC2    | MIRT561610 |
| hsa-miR-548e-5p | STK4     | MIRT534045 |
| hsa-miR-548e-5p | STRADB   | MIRT300115 |
| hsa-miR-548y    | ARL13B   | MIRT525866 |
| hsa-miR-548y    | CHEK2    | MIRT548900 |
| hsa-miR-548y    | GTF2H5   | MIRT442839 |
| hsa-miR-548y    | MKLN1    | MIRT551048 |
| hsa-miR-548y    | SVOP     | MIRT499866 |
| hsa-miR-548y    | THRAP3   | MIRT340674 |
| hsa-miR-548y    | TMEM241  | MIRT550488 |
| hsa-miR-548y    | UHMK1    | MIRT750837 |
| hsa-miR-548y    | ZMPSTE24 | MIRT774579 |
| hsa-miR-585-3p  | CDC25B   | MIRT751542 |
| hsa-miR-585-3p  | EIF5A2   | MIRT703996 |
| hsa-miR-585-3p  | MAPK1    | MIRT473718 |
| hsa-miR-585-3p  | TMEM175  | MIRT719511 |
| hsa-miR-626     | GPAT4    | MIRT716889 |
| hsa-miR-626     | PTGS1    | MIRT717690 |
| hsa-miR-626     | RUFY2    | MIRT699932 |
| hsa-miR-626     | SLC7A5   | MIRT004144 |
| hsa-miR-626     | SMCR8    | MIRT752623 |
| hsa-miR-626     | WASF2    | MIRT776120 |
| hsa-miR-888-5p  | CDK13    | MIRT720034 |
| hsa-miR-888-5p  | DCP2     | MIRT615047 |
| hsa-miR-888-5p  | EDEM1    | MIRT624071 |
| hsa-miR-888-5p  | MCTS1    | MIRT572734 |
| hsa-miR-888-5p  | NIBAN1   | MIRT507357 |
| hsa-miR-888-5p  | SLC39A9  | MIRT666226 |
| hsa-miR-95-3p   | NXP3     | MIRT782990 |
